# Supplementary material for: Phase-amplitude coupling supports phase coding in human ECoG
Source: eLife journal article supplement (doi:10.7554/elife.07886), 2015-08-26
Supplement: supp [file elife-07886-supp-v1.zip]

Archive with 11 entries (11 files):
- elife_poa_e07886_Figure_2_figure_supplement_1.pdf
- elife_poa_e07886_Figure_1_figure_supplement_1.pdf
- elife_poa_e07886_Figure_3_figure_supplement_3.pdf
- elife_poa_e07886_Video_2.avi
- elife_poa_e07886_Video_1.avi
- elife_poa_e07886_Figure_2_figure_supplement_3.pdf
- elife_poa_e07886_Figure_3_figure_supplement_1.pdf
- elife_poa_e07886_Figure_4_figure_supplement_2.pdf
- elife_poa_e07886_Figure_2_figure_supplement_2.pdf
- elife_poa_e07886_Figure_3_figure_supplement_2.pdf
- elife_poa_e07886_Figure_4_figure_supplement_1.eps
