# Supplementary figures and images for: Phase-amplitude coupling supports phase coding in human ECoG
Source: eLife journal article supplement (doi:10.7554/elife.07886), 2015-08-26

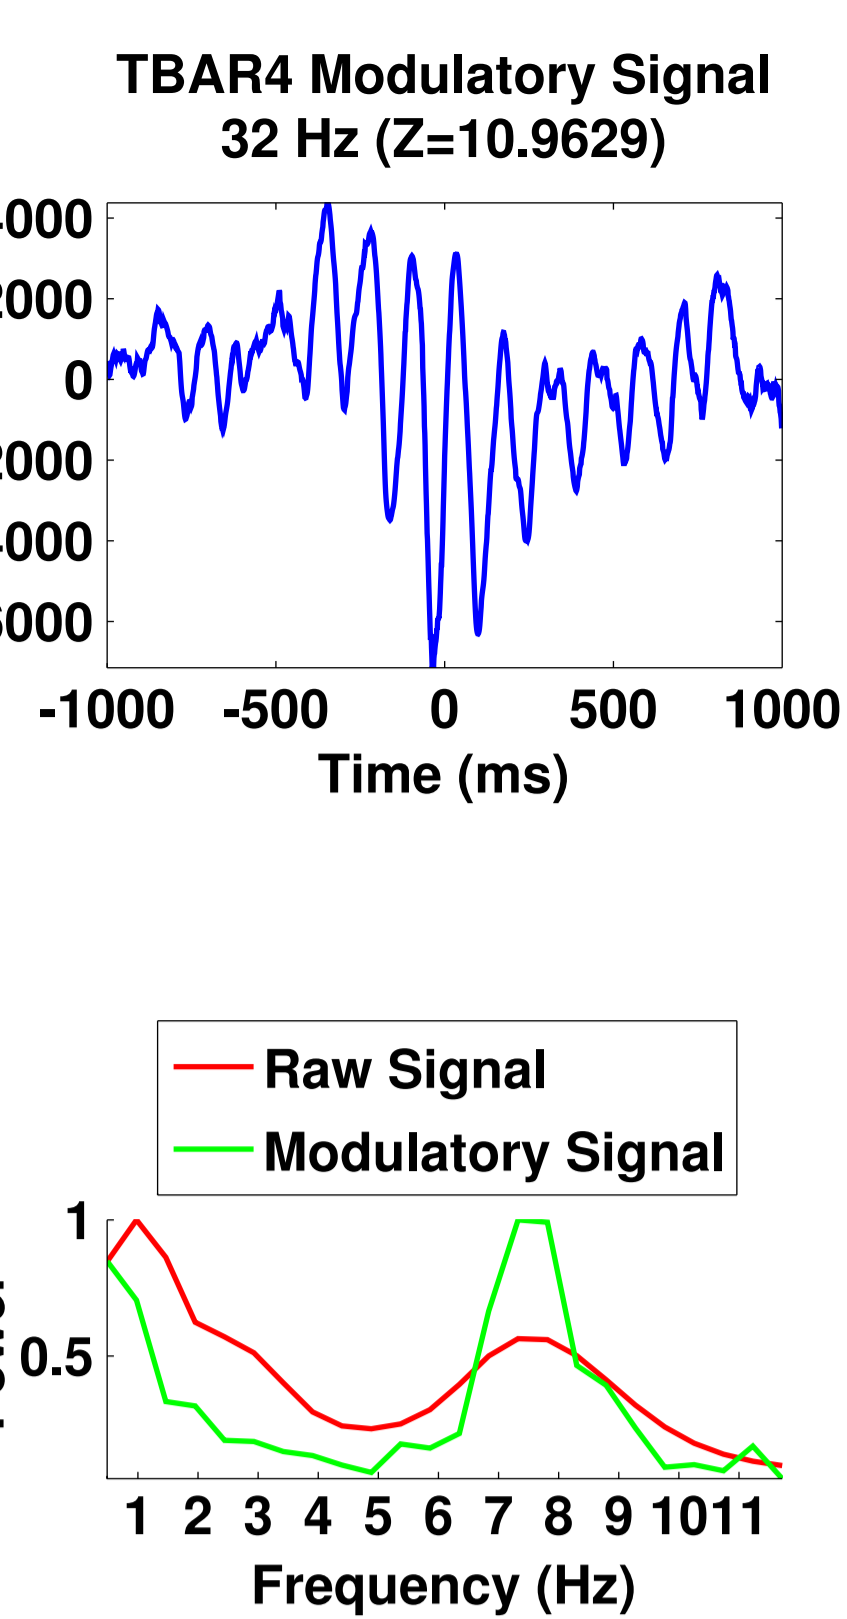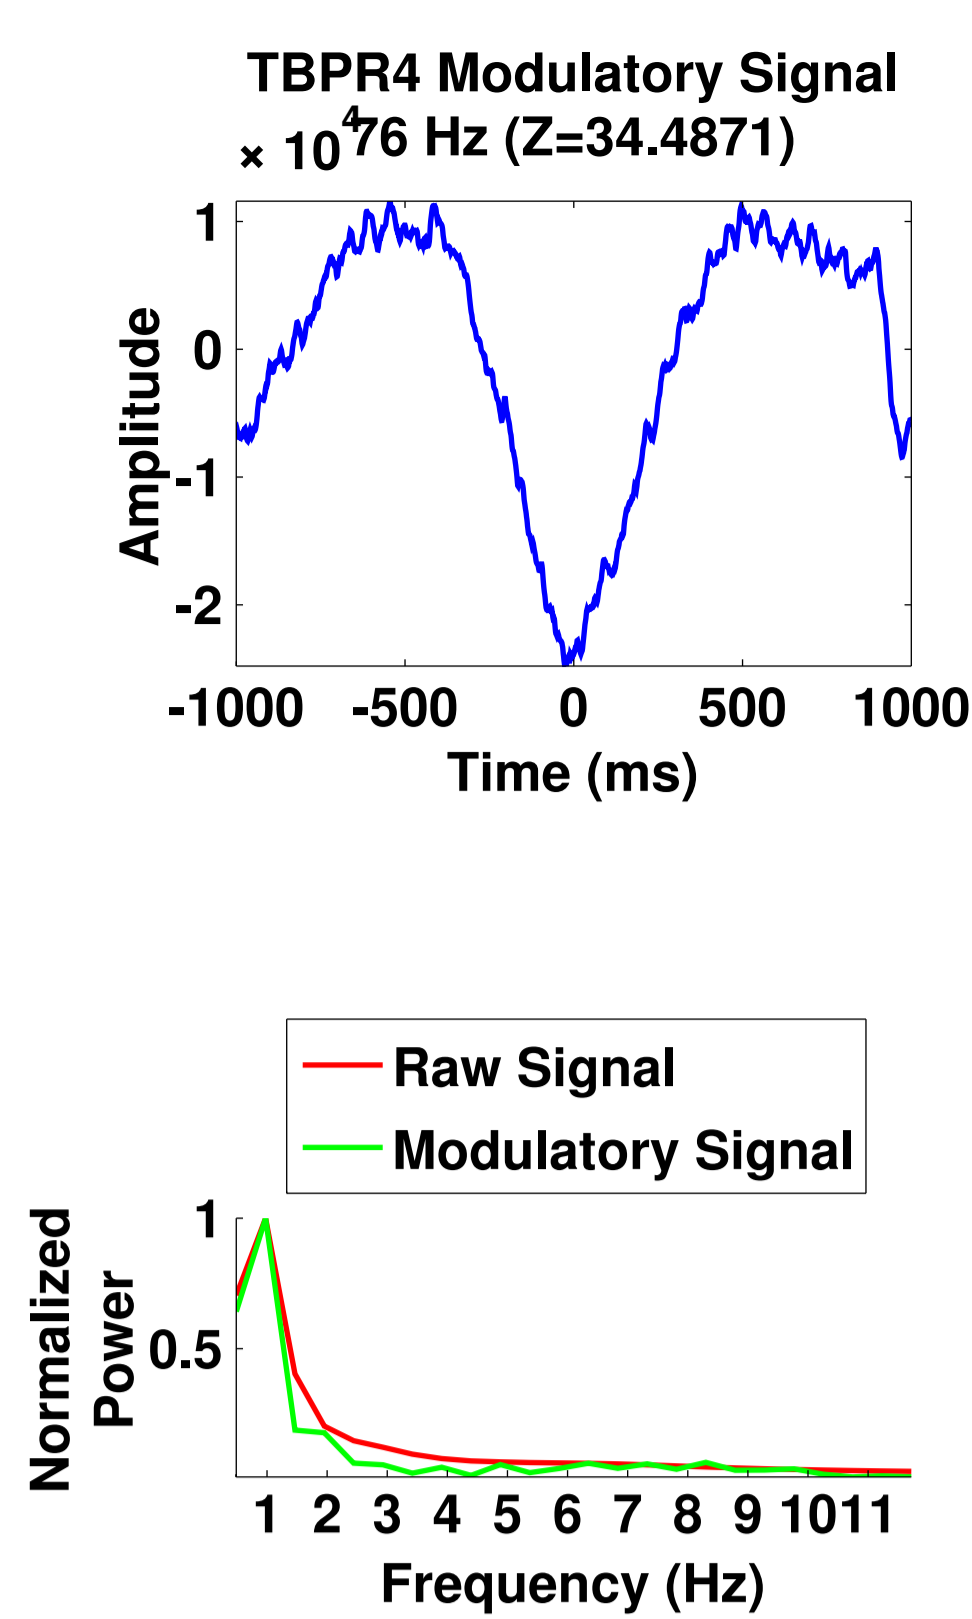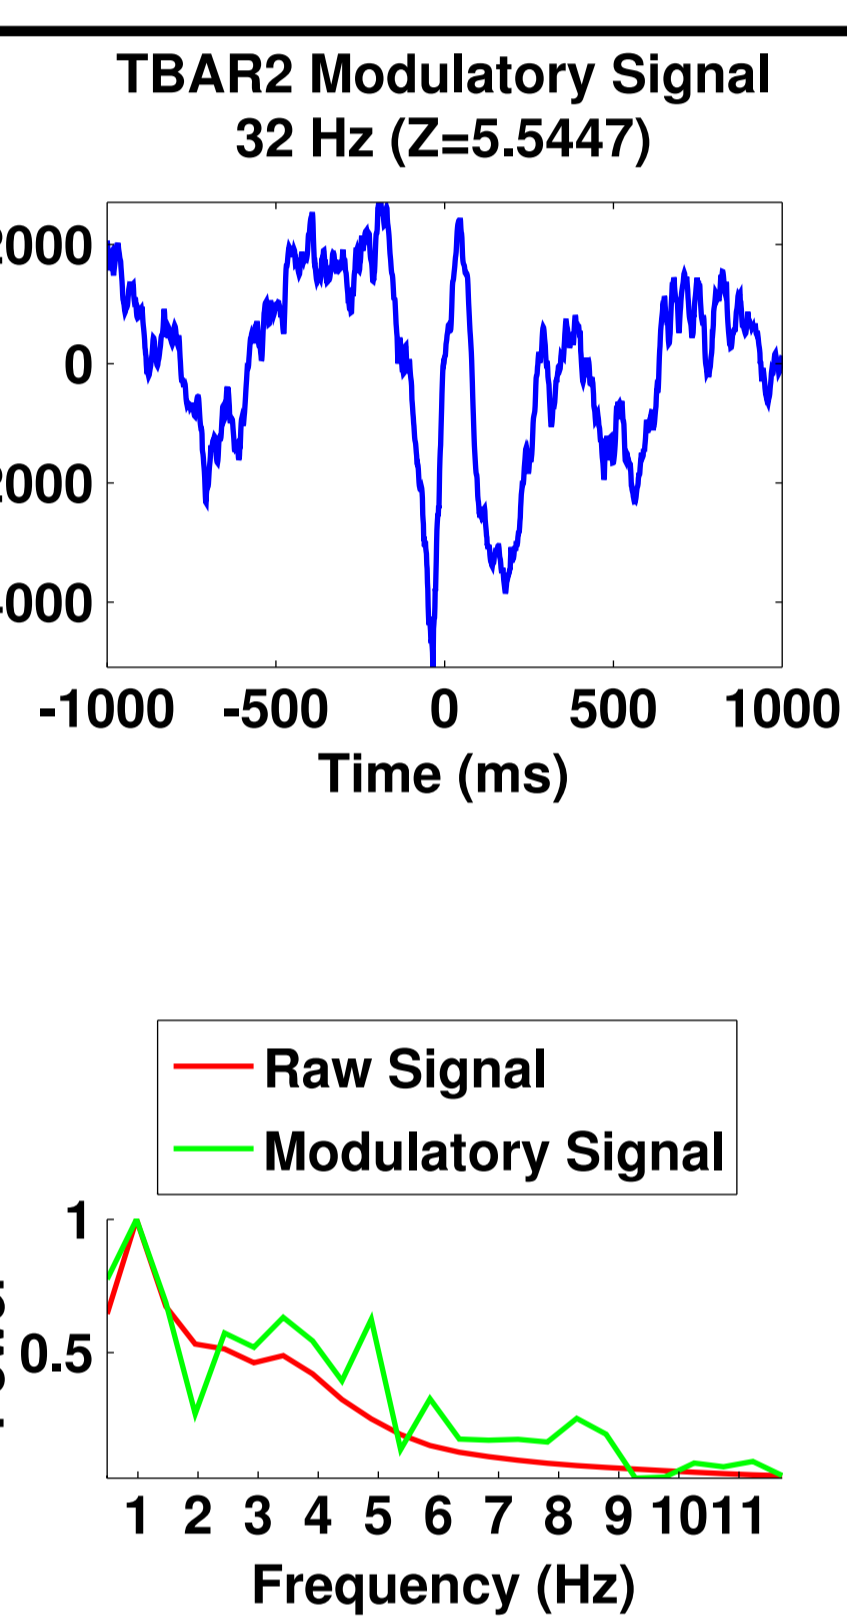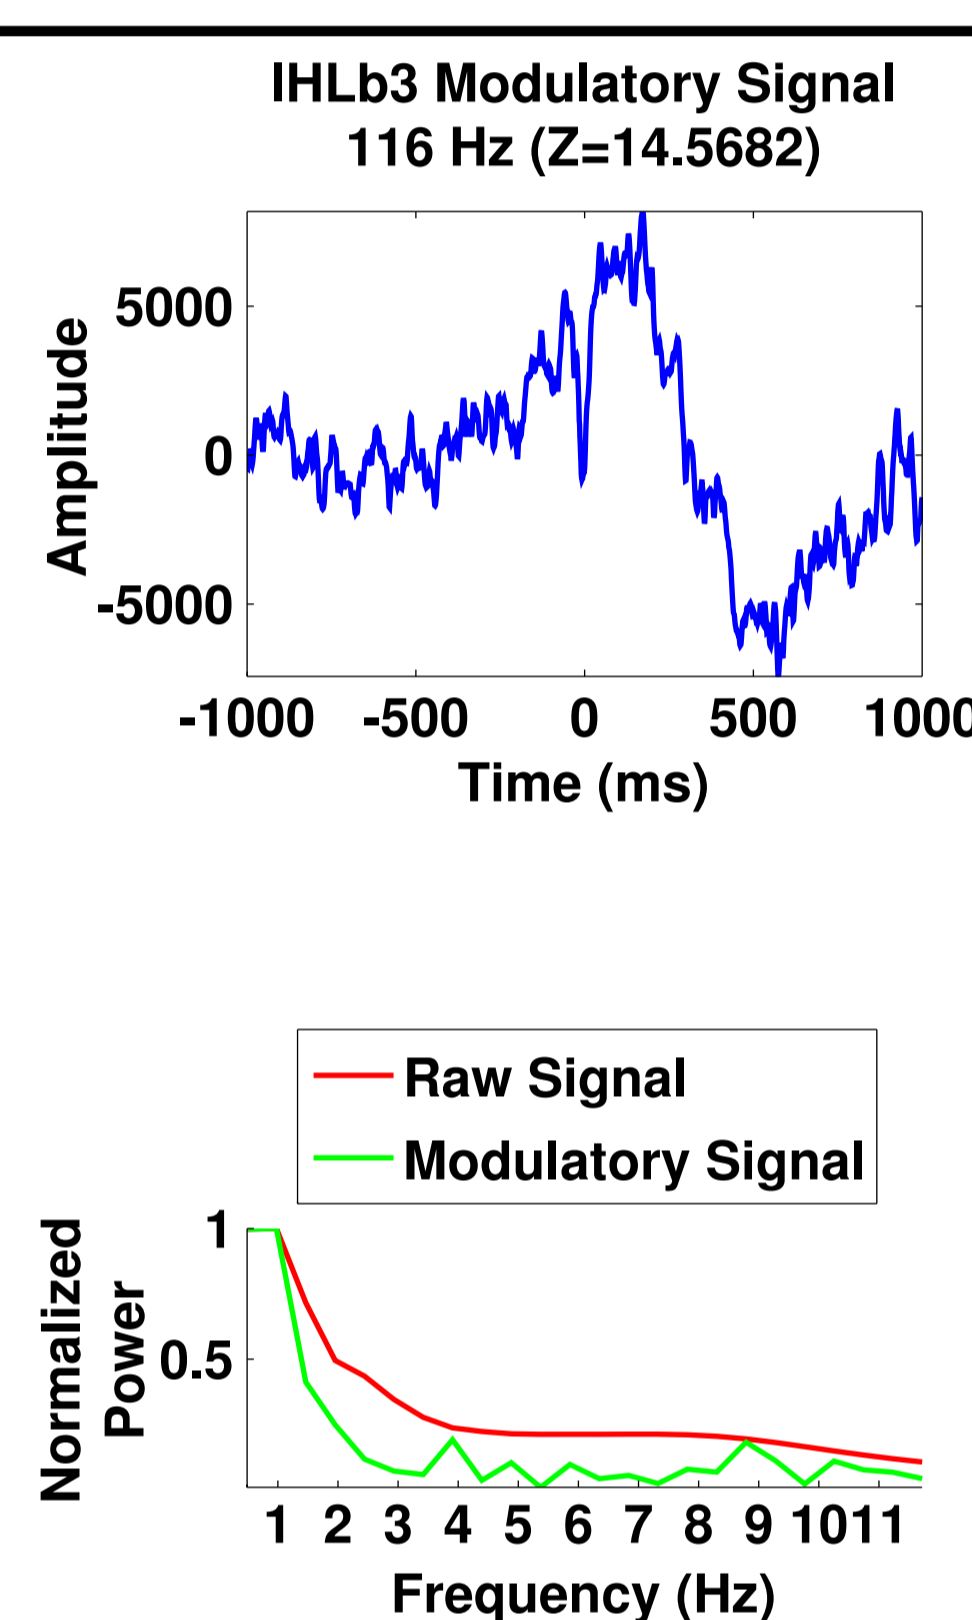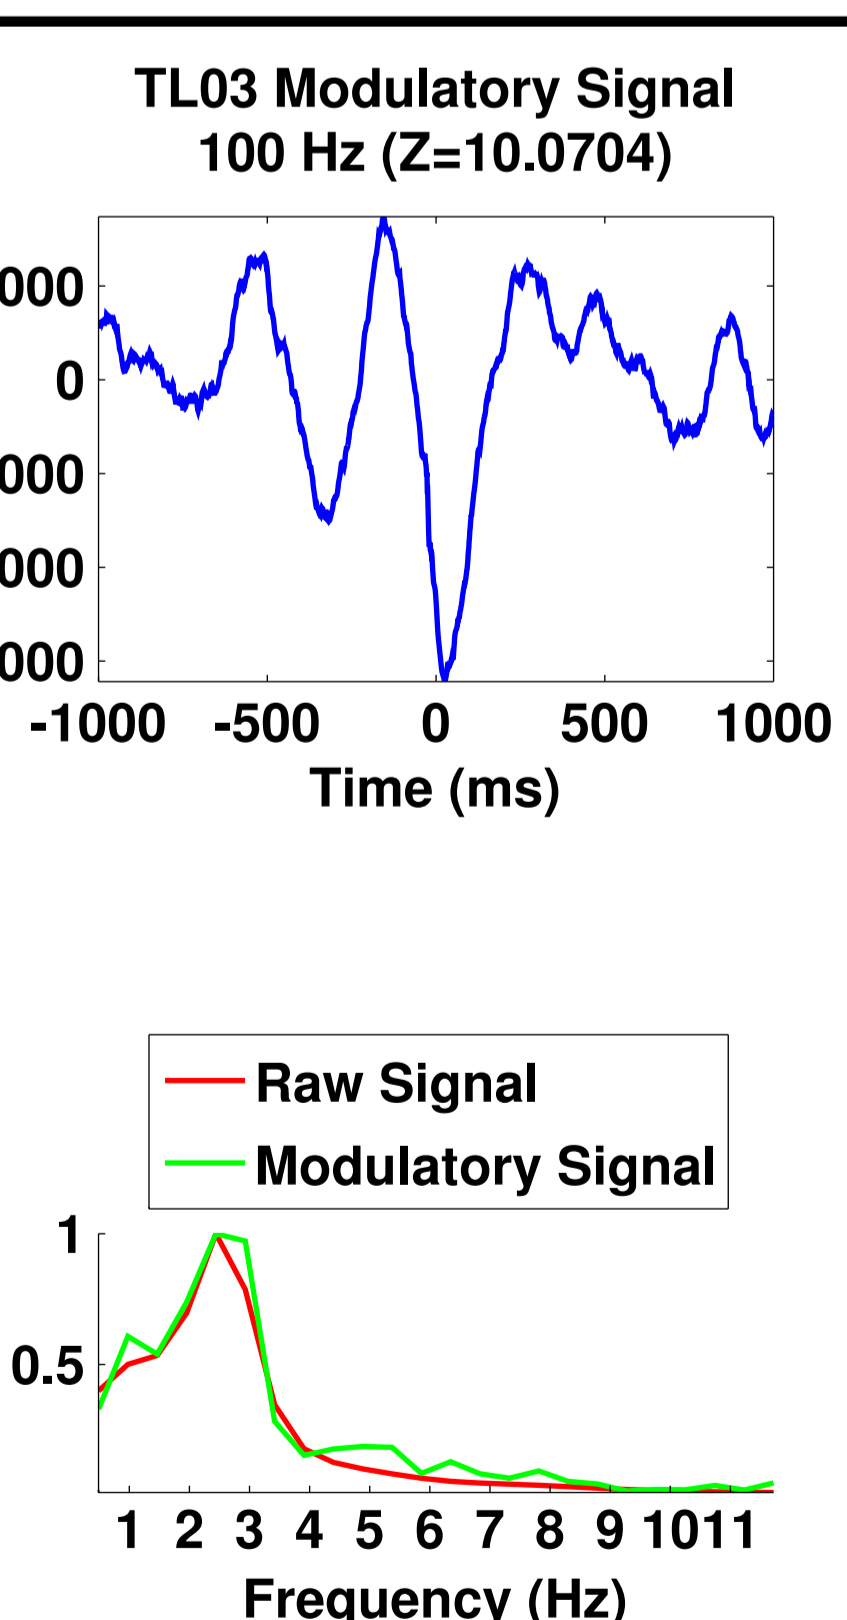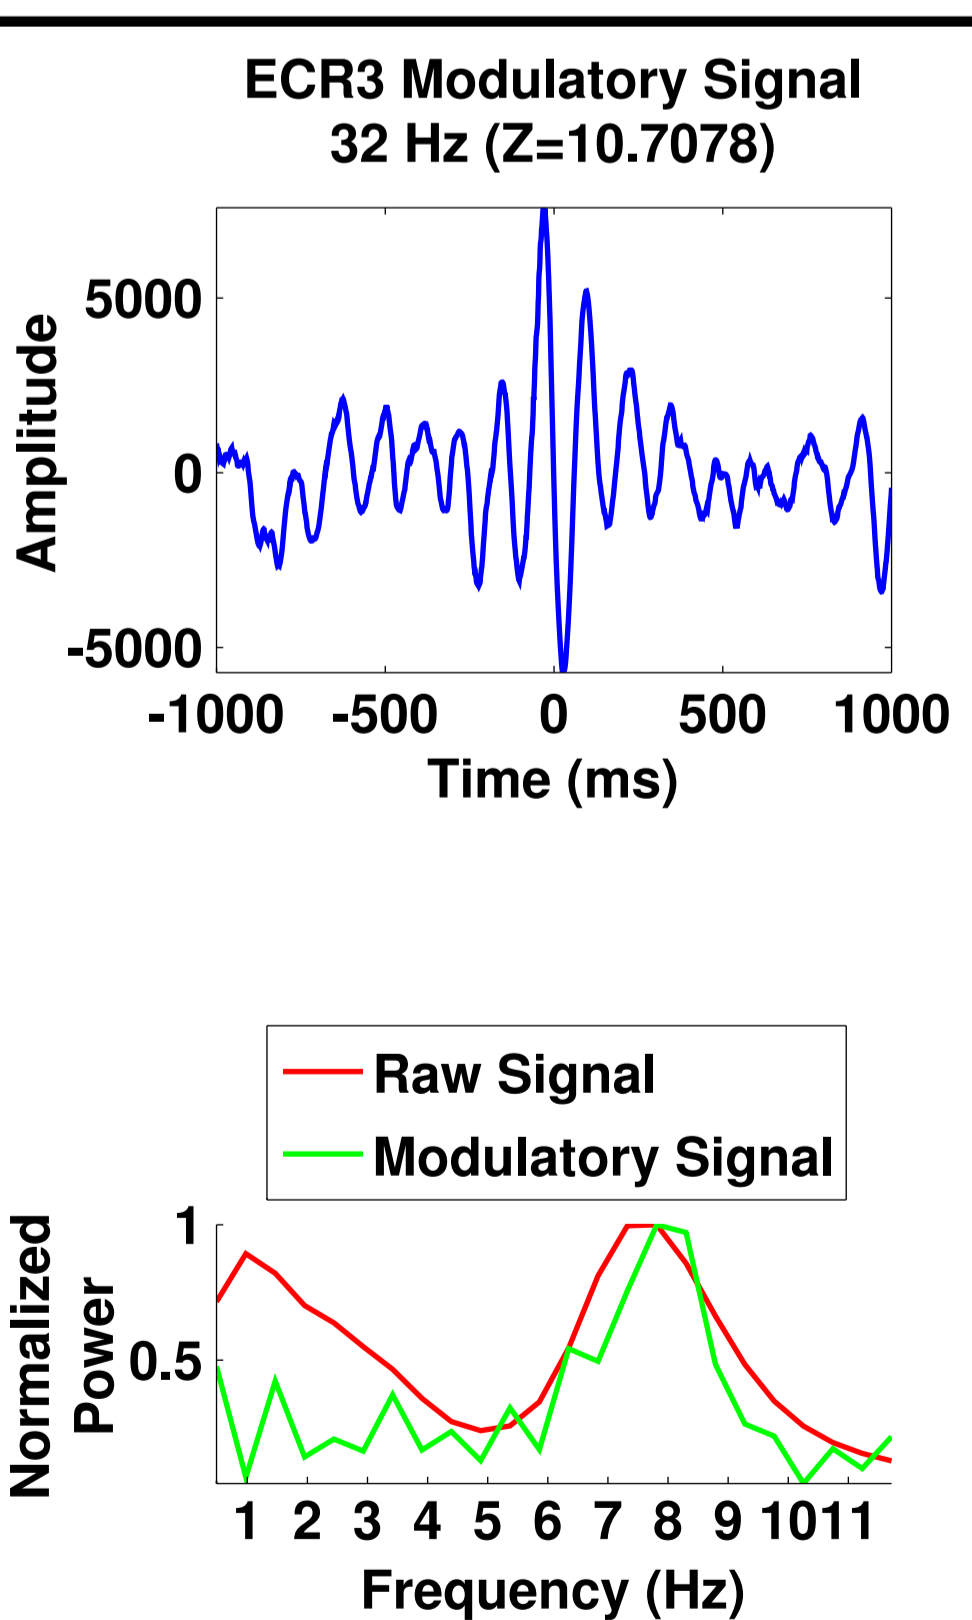

Supplement: supp [file elife-07886-supp-v1.zip › elife_poa_e07886_Figure_2_figure_supplement_1.pdf]

## A) PAC detection (OTC) Methods

At each frequency in HFA band

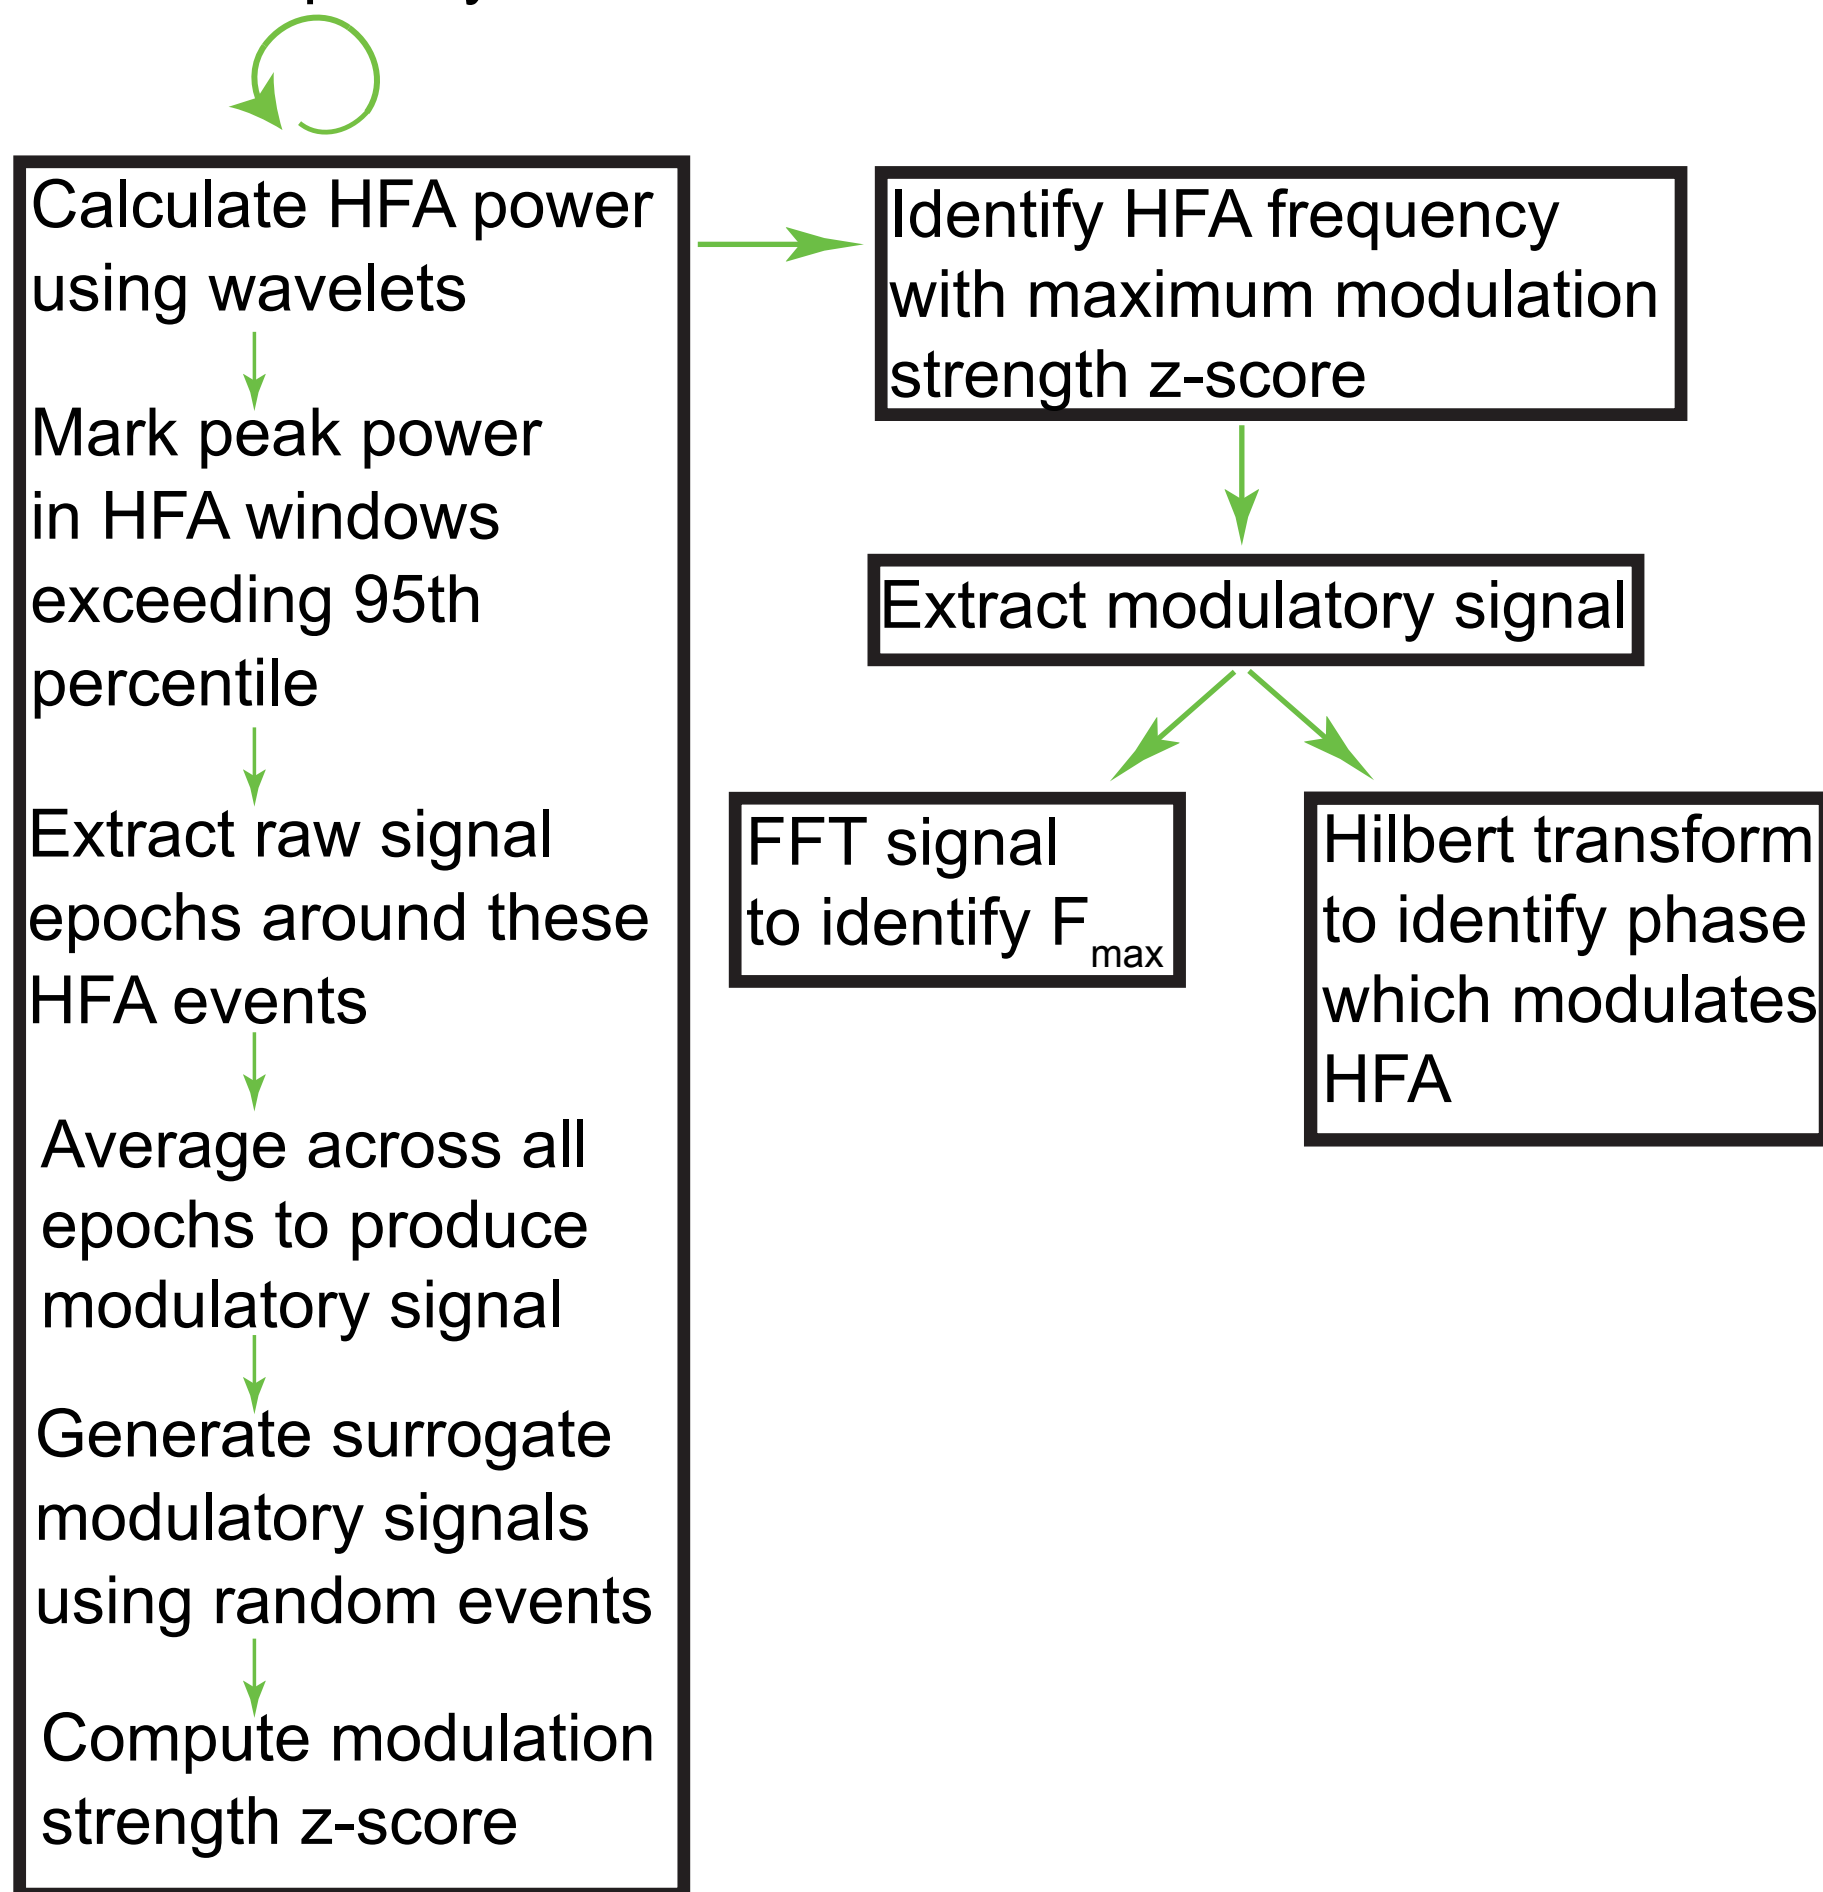

## B) Difference Score Methods

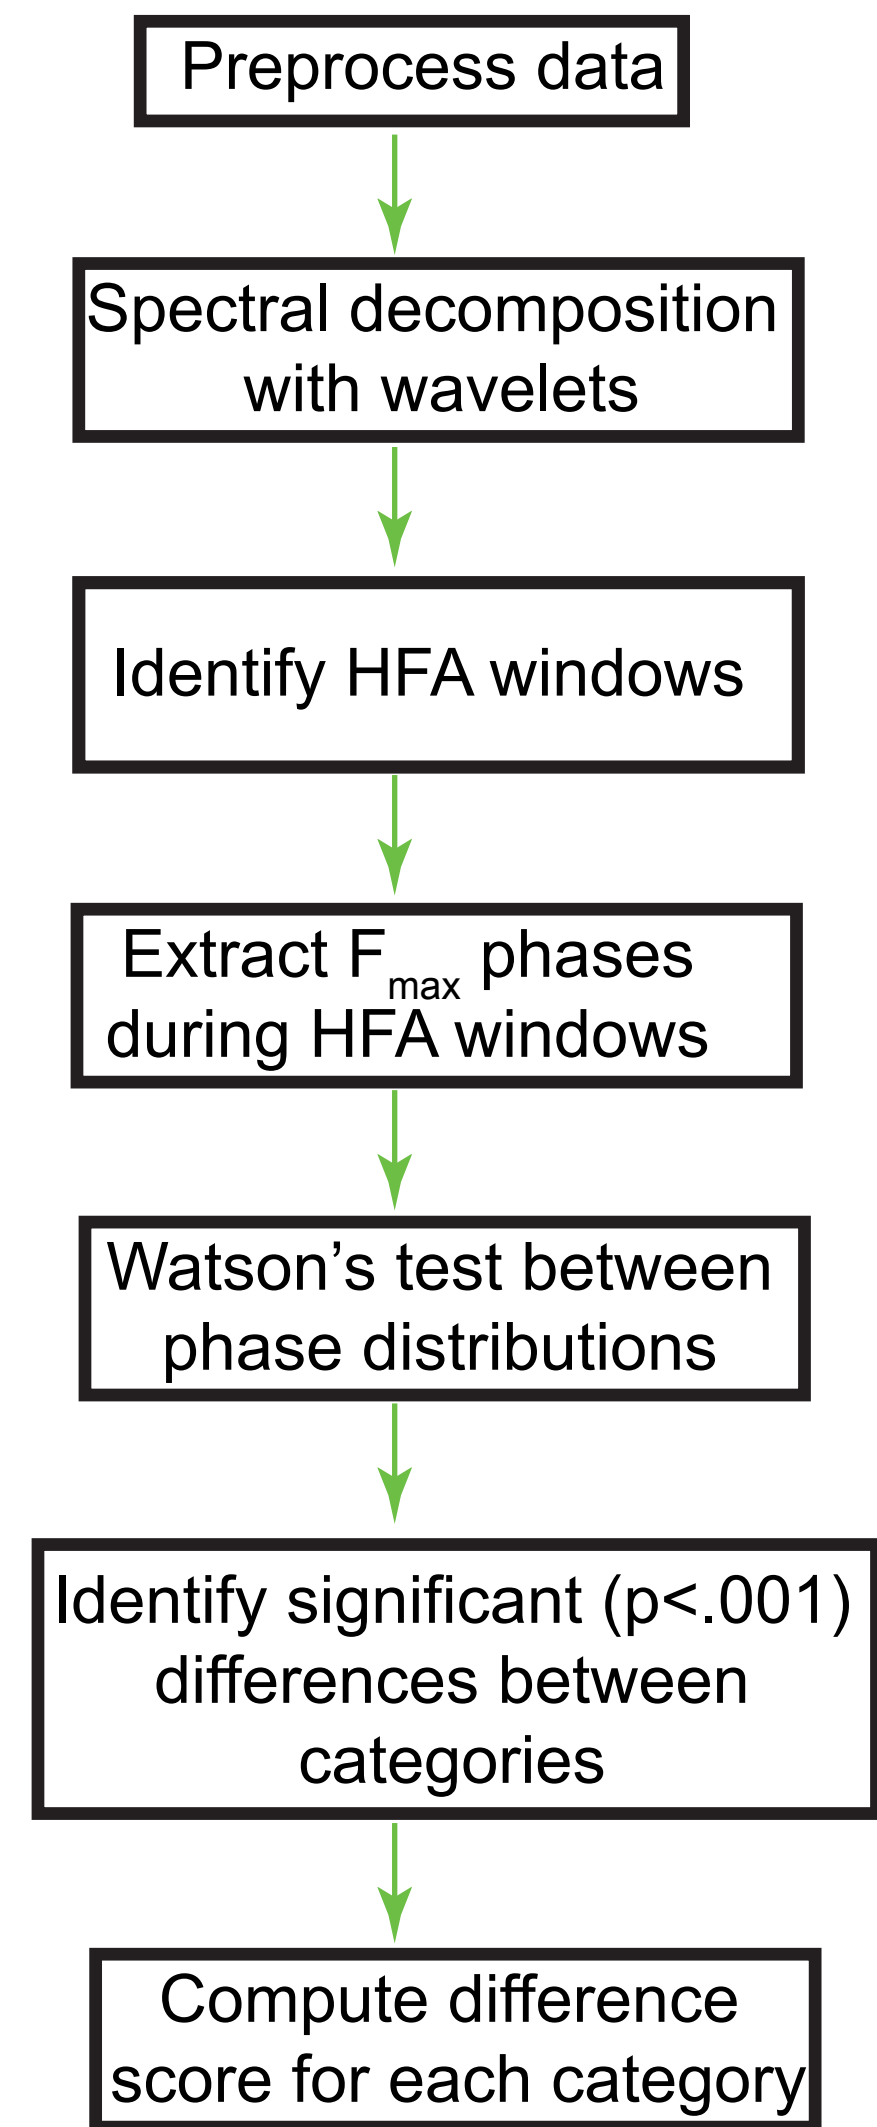

Supplement: supp [file elife-07886-supp-v1.zip › elife_poa_e07886_Figure_1_figure_supplement_1.pdf]

Houses

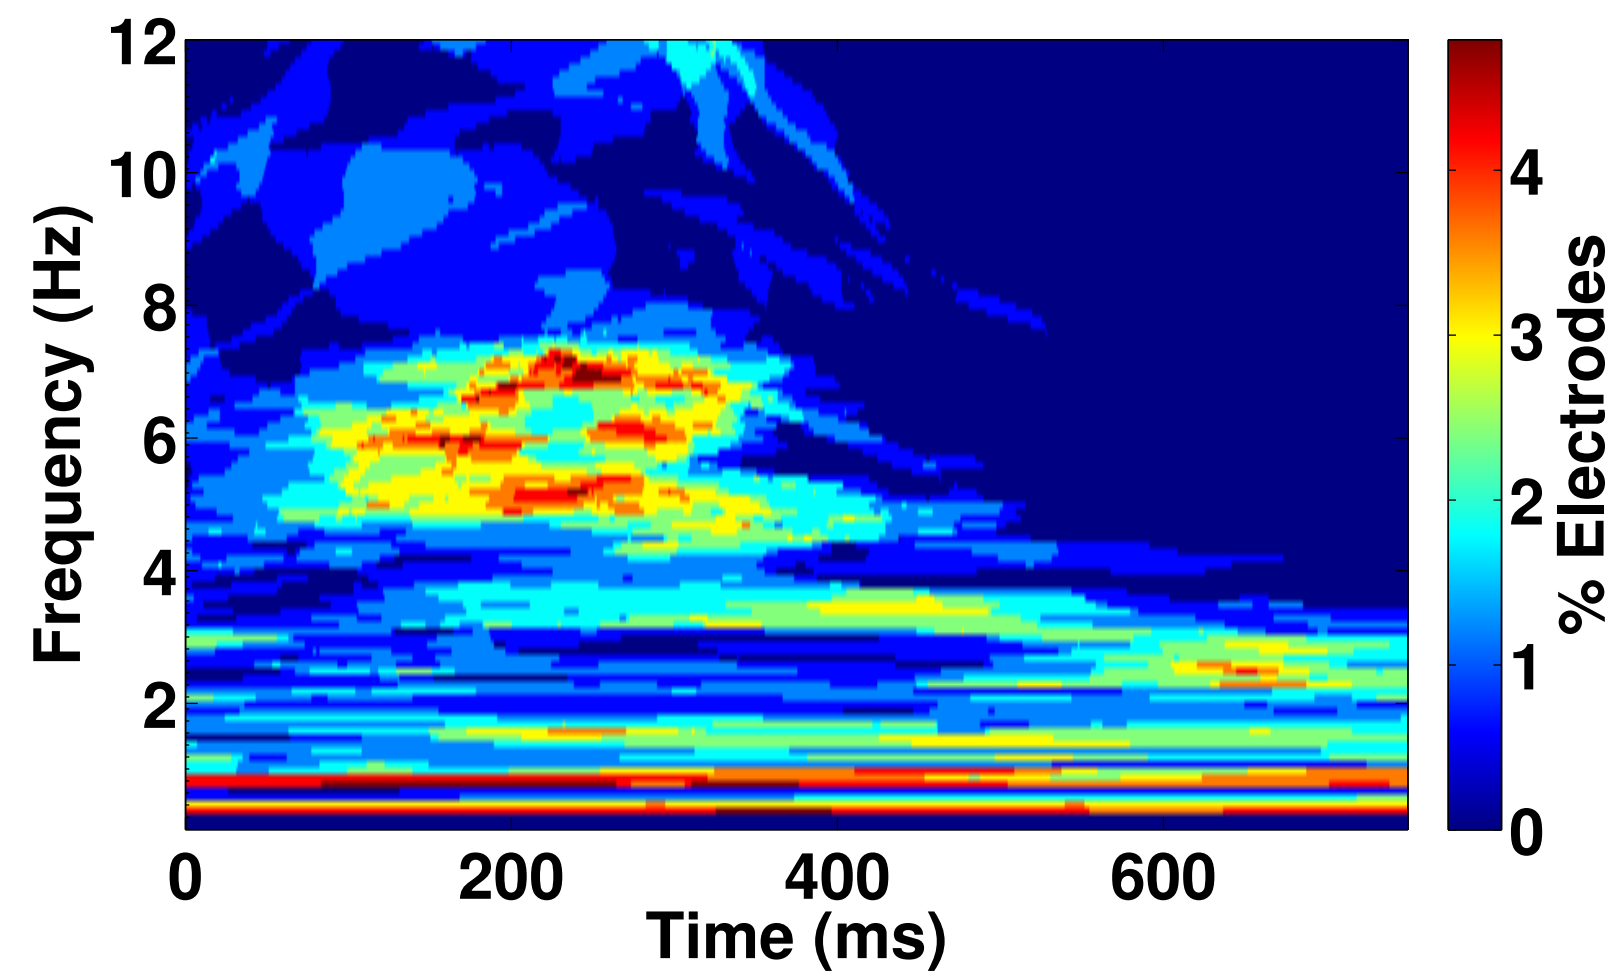

Tools

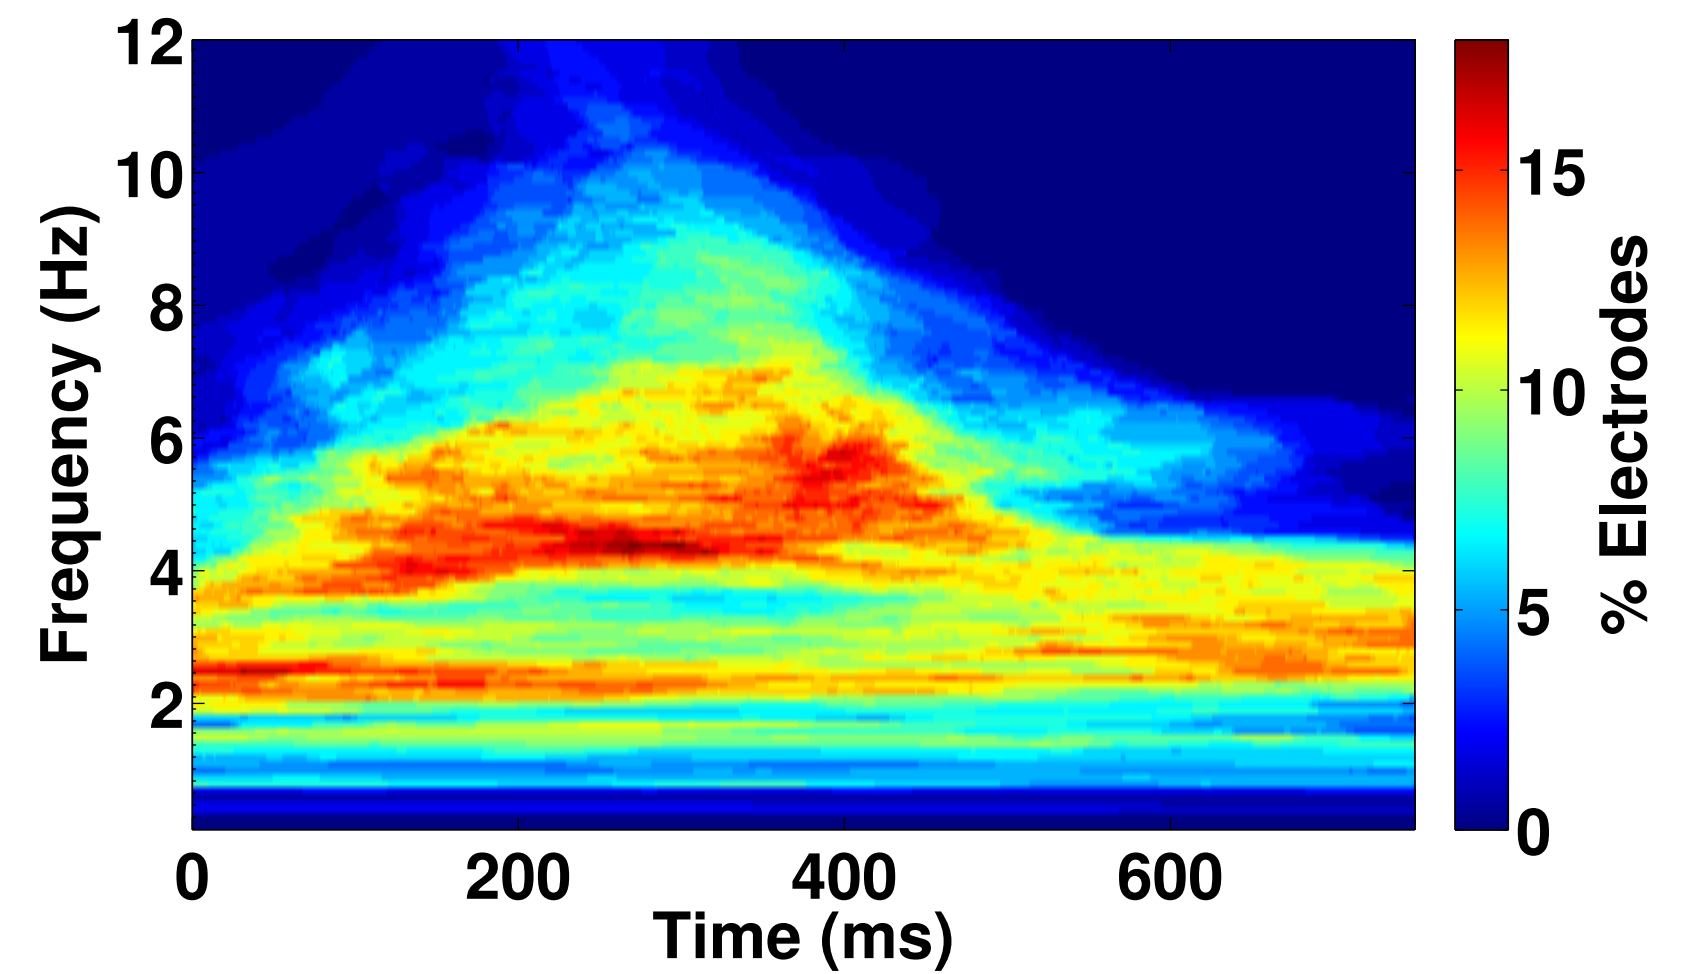

Scenes

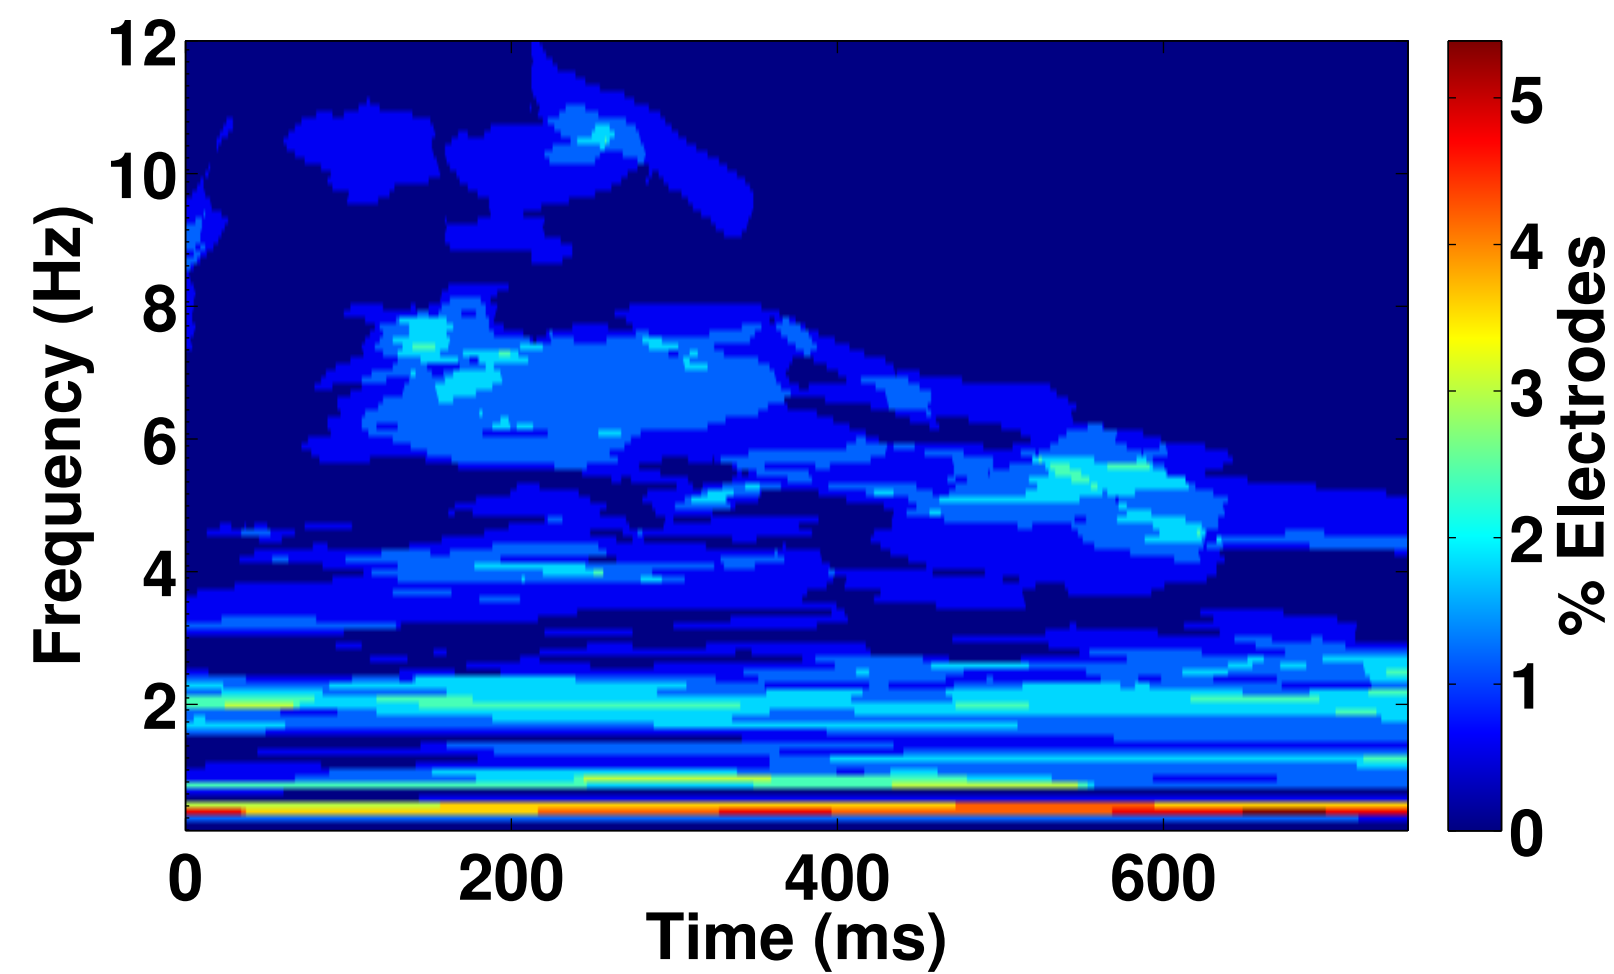

Faces

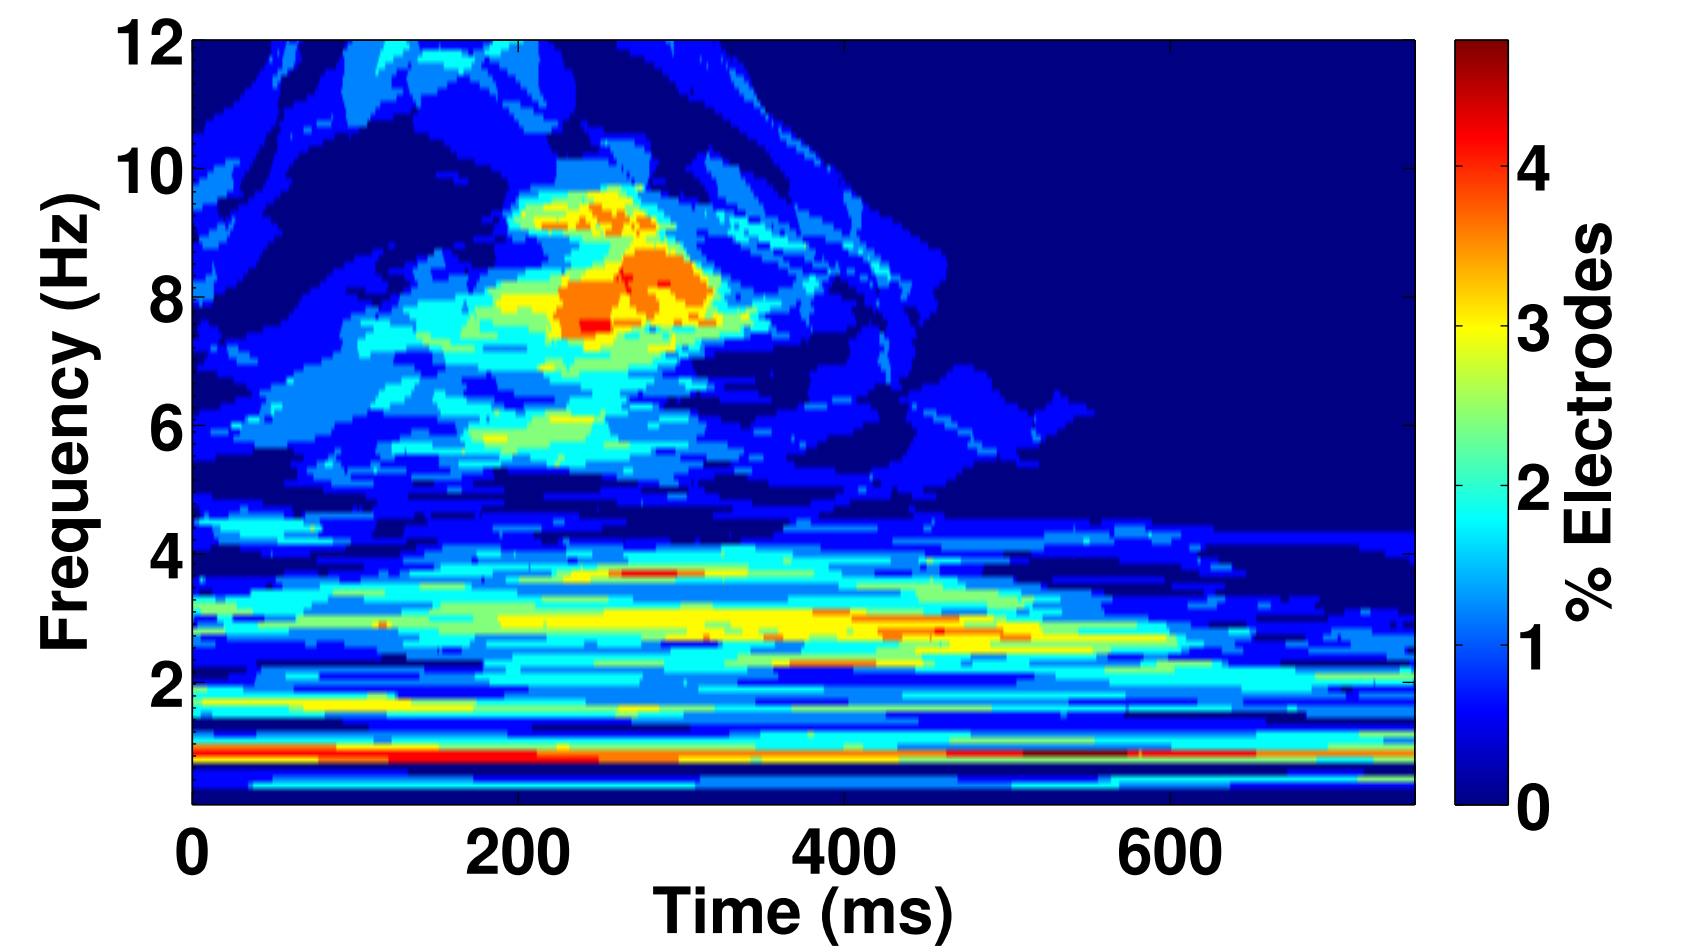

Supplement: supp [file elife-07886-supp-v1.zip › elife_poa_e07886_Figure_3_figure_supplement_3.pdf]

**A**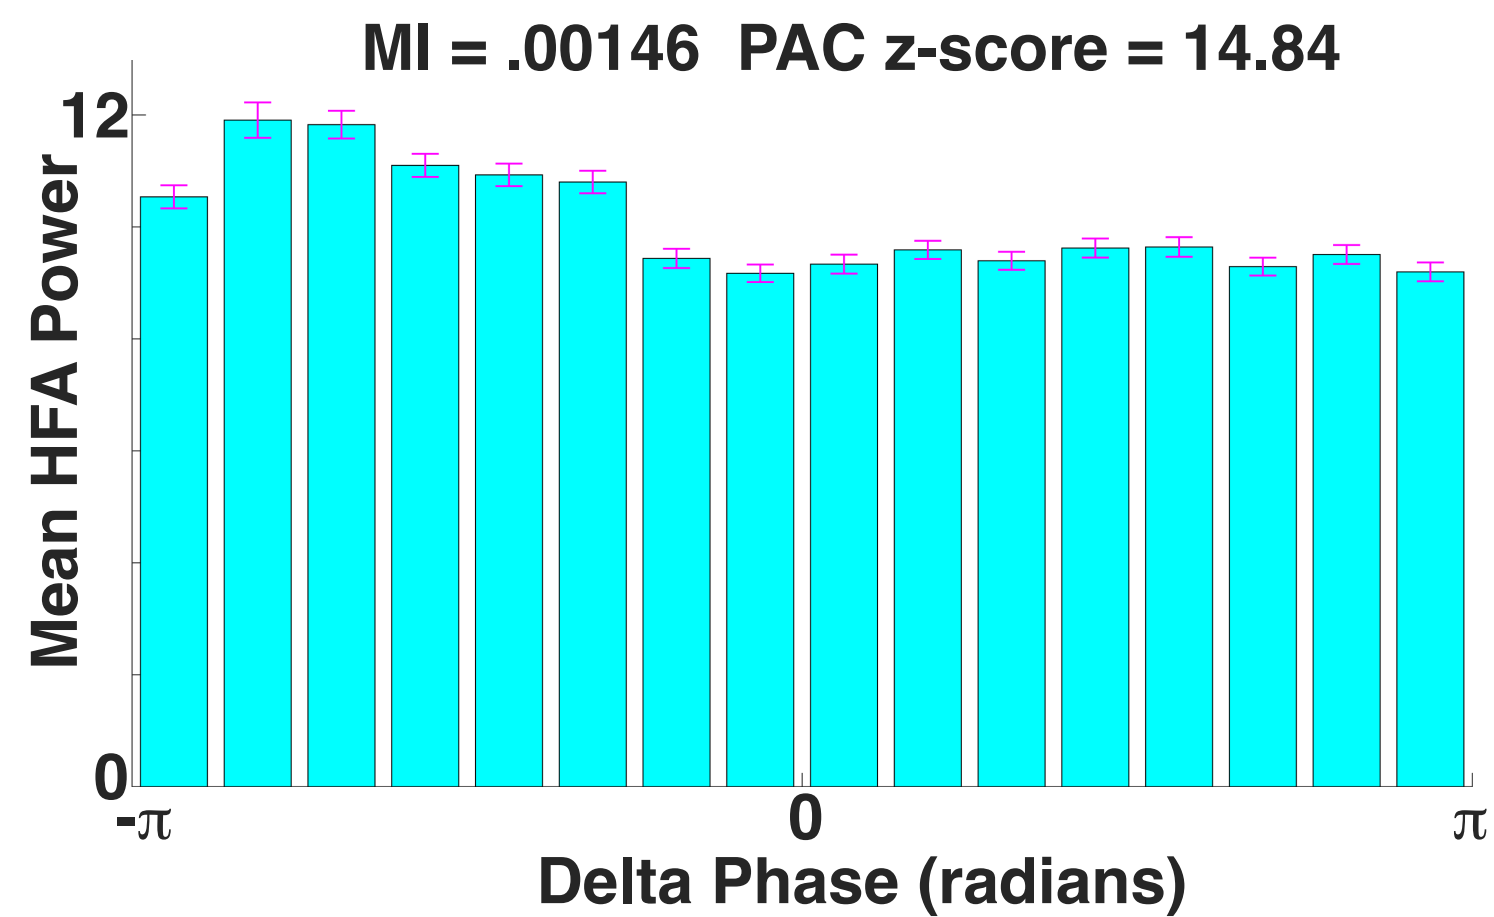**C**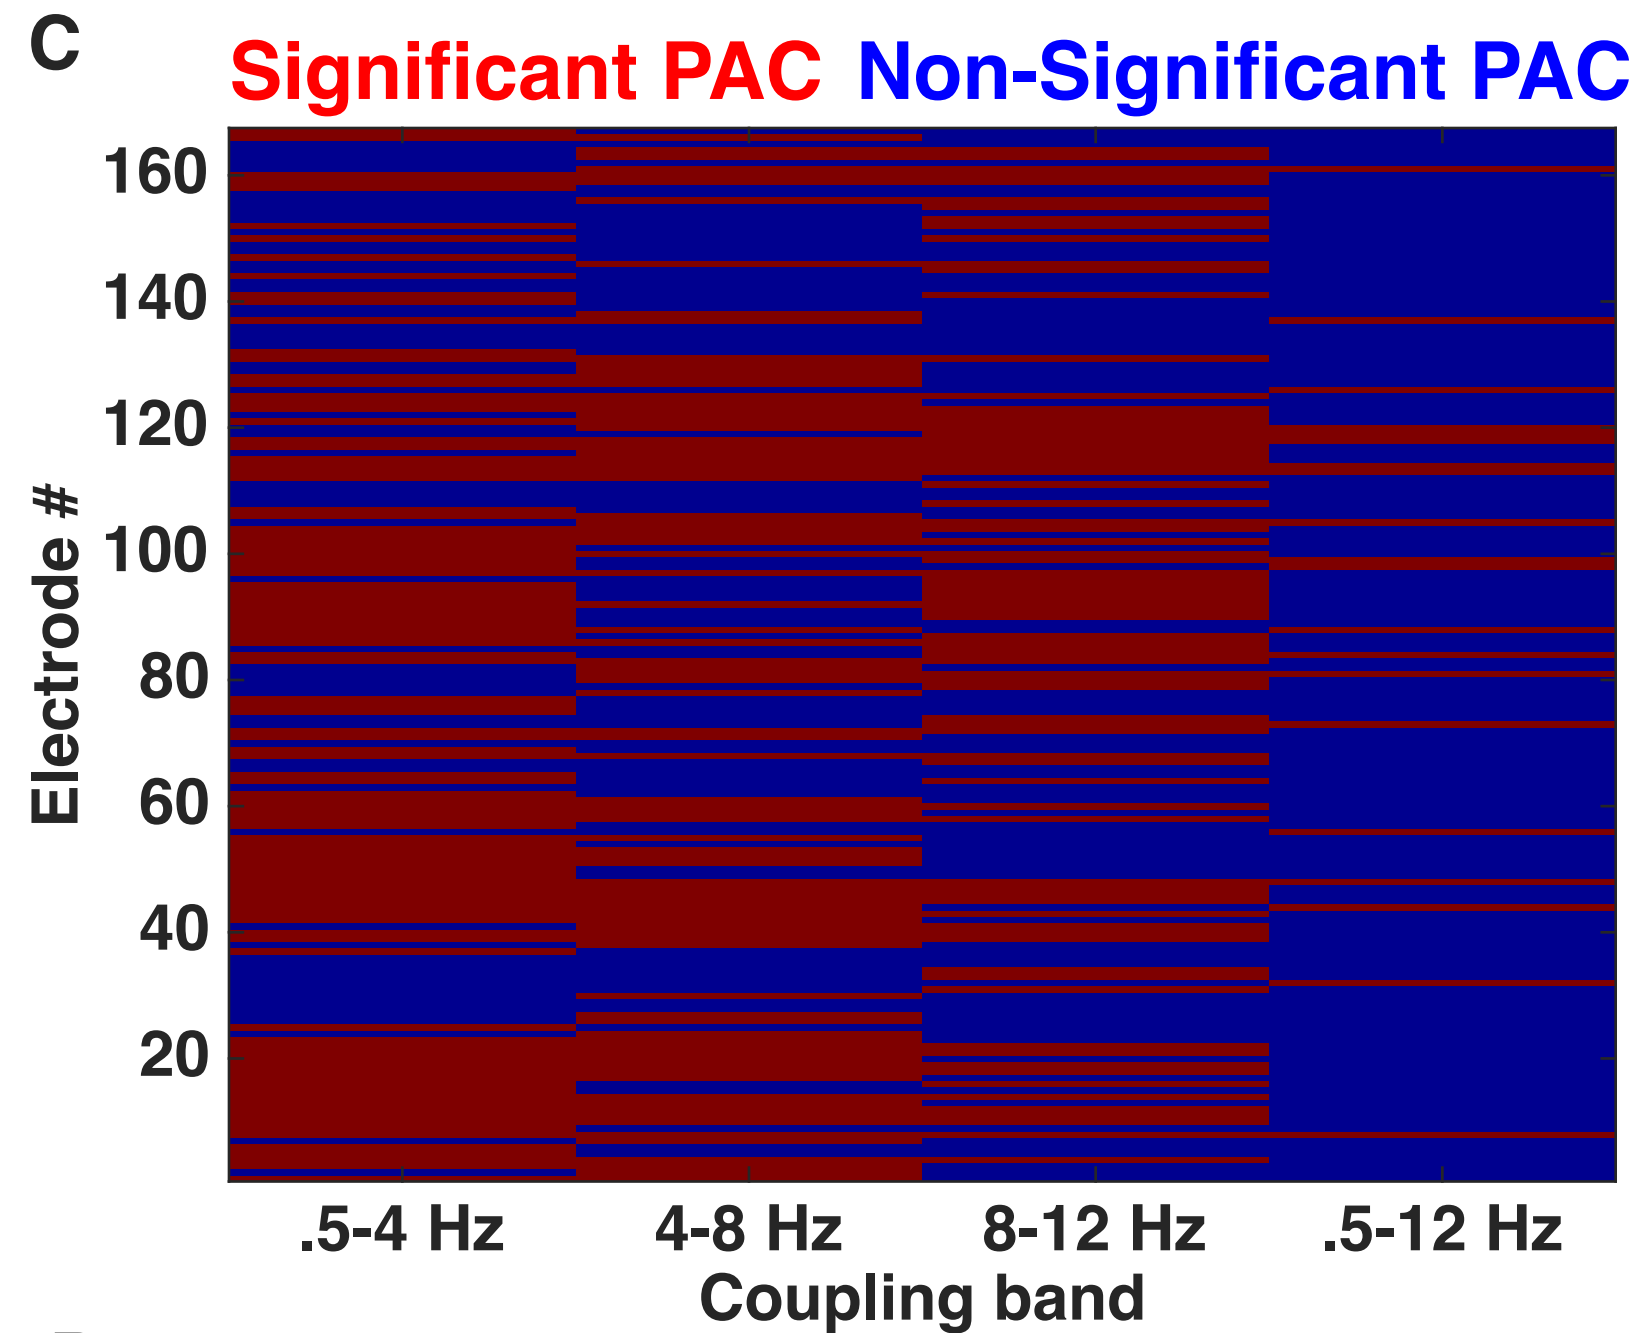**B**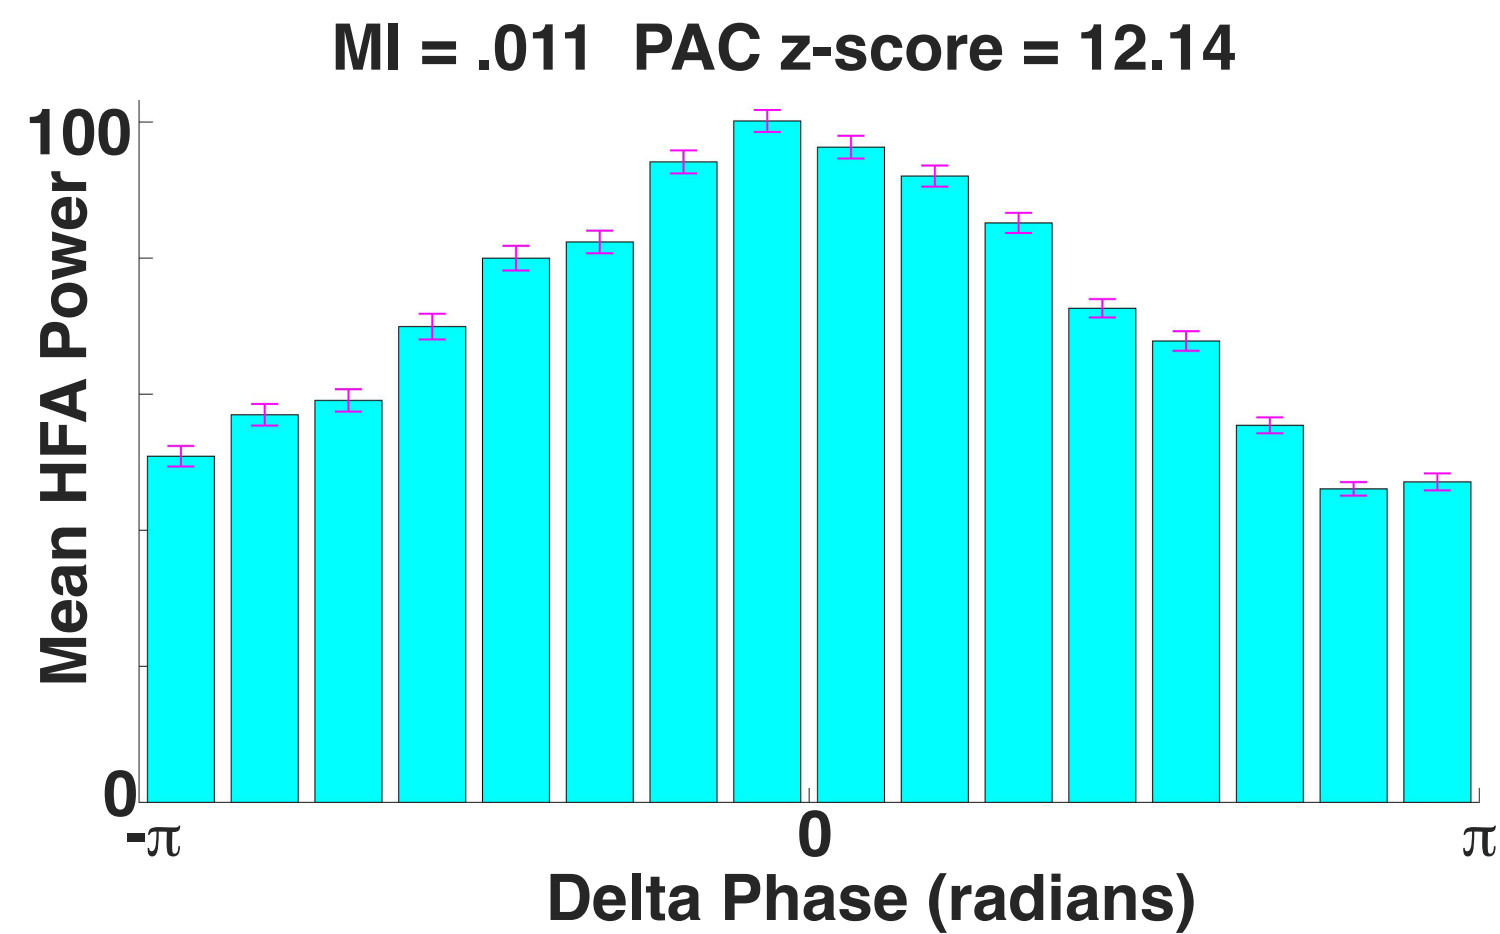**D**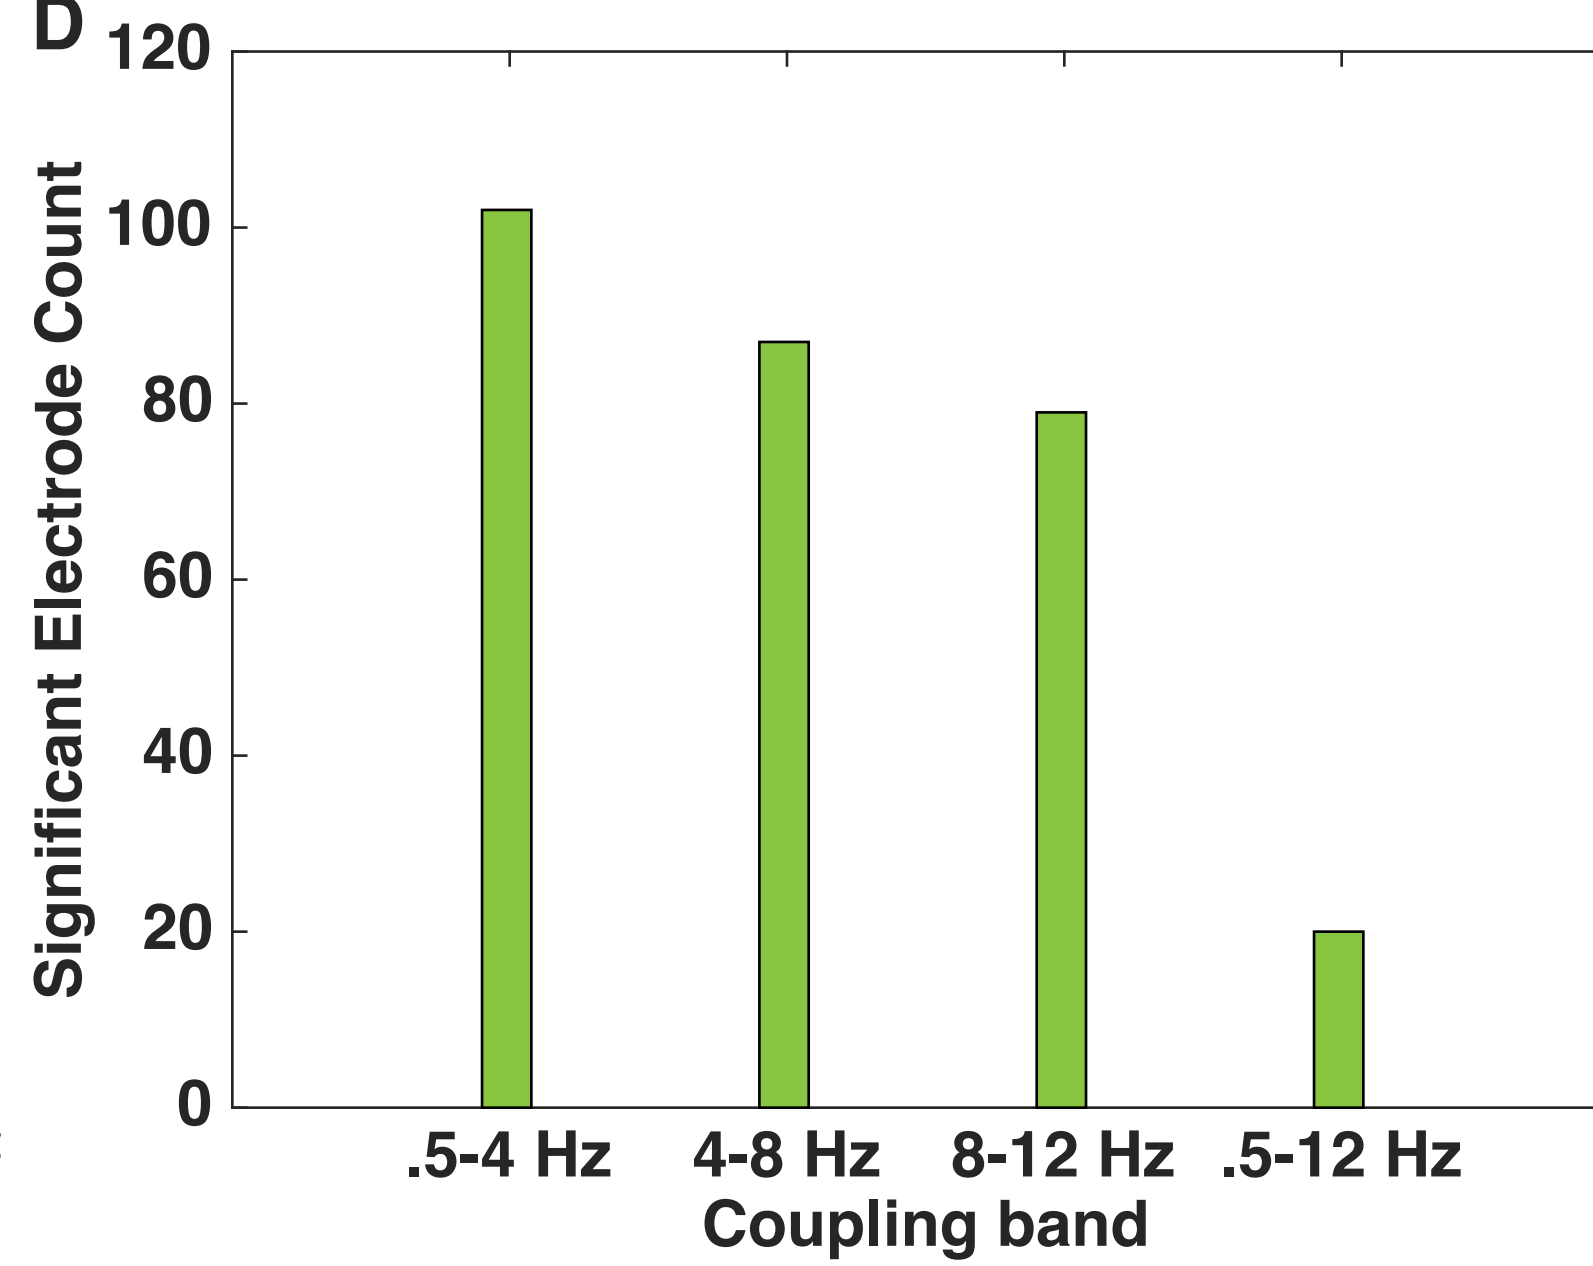**E**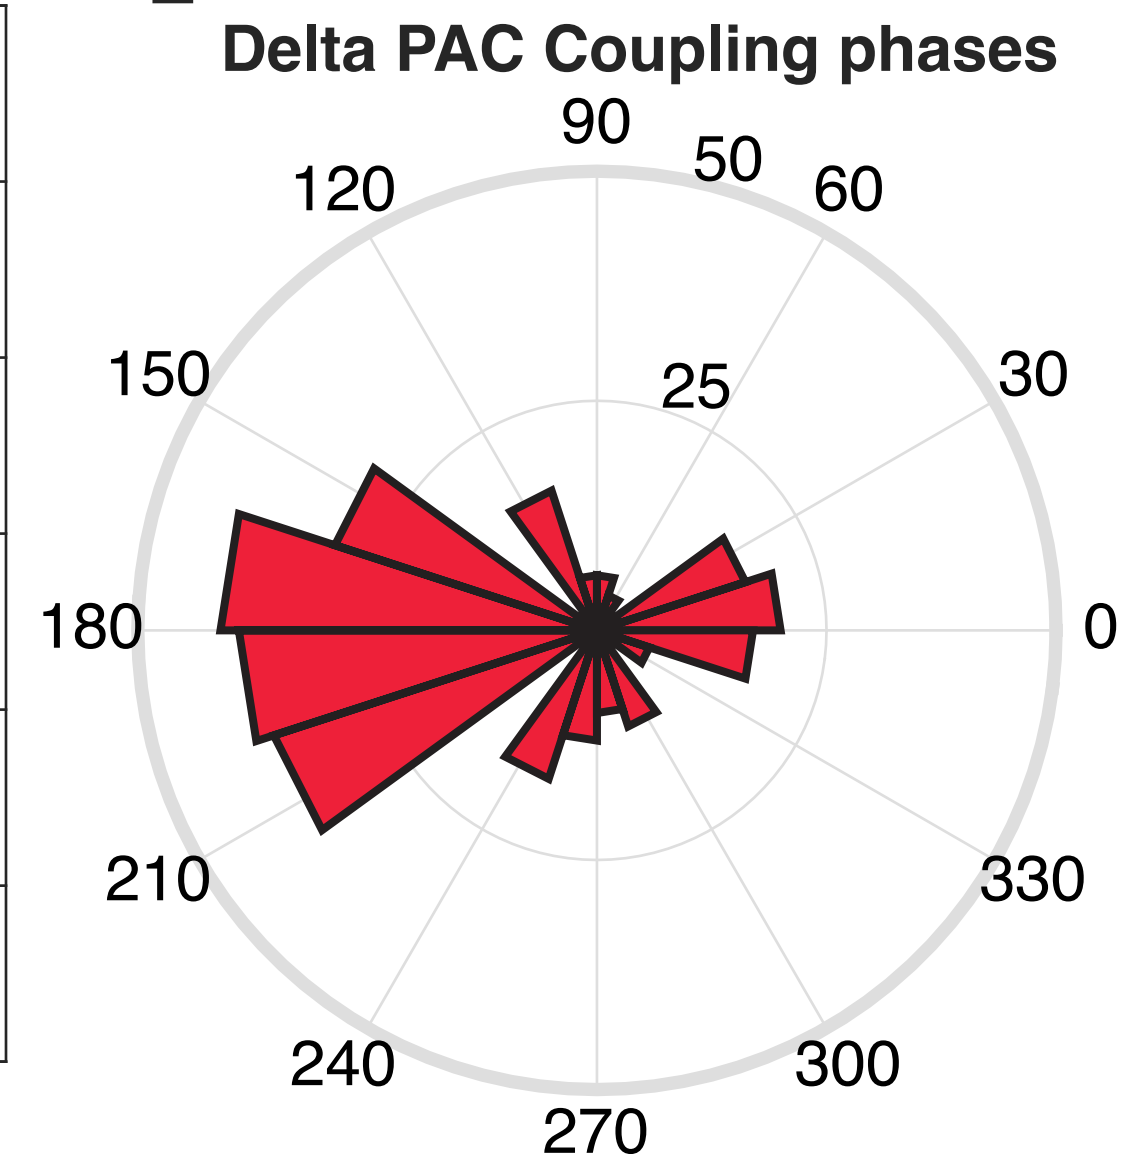

Supplement: supp [file elife-07886-supp-v1.zip › elife_poa_e07886_Figure_2_figure_supplement_3.pdf]

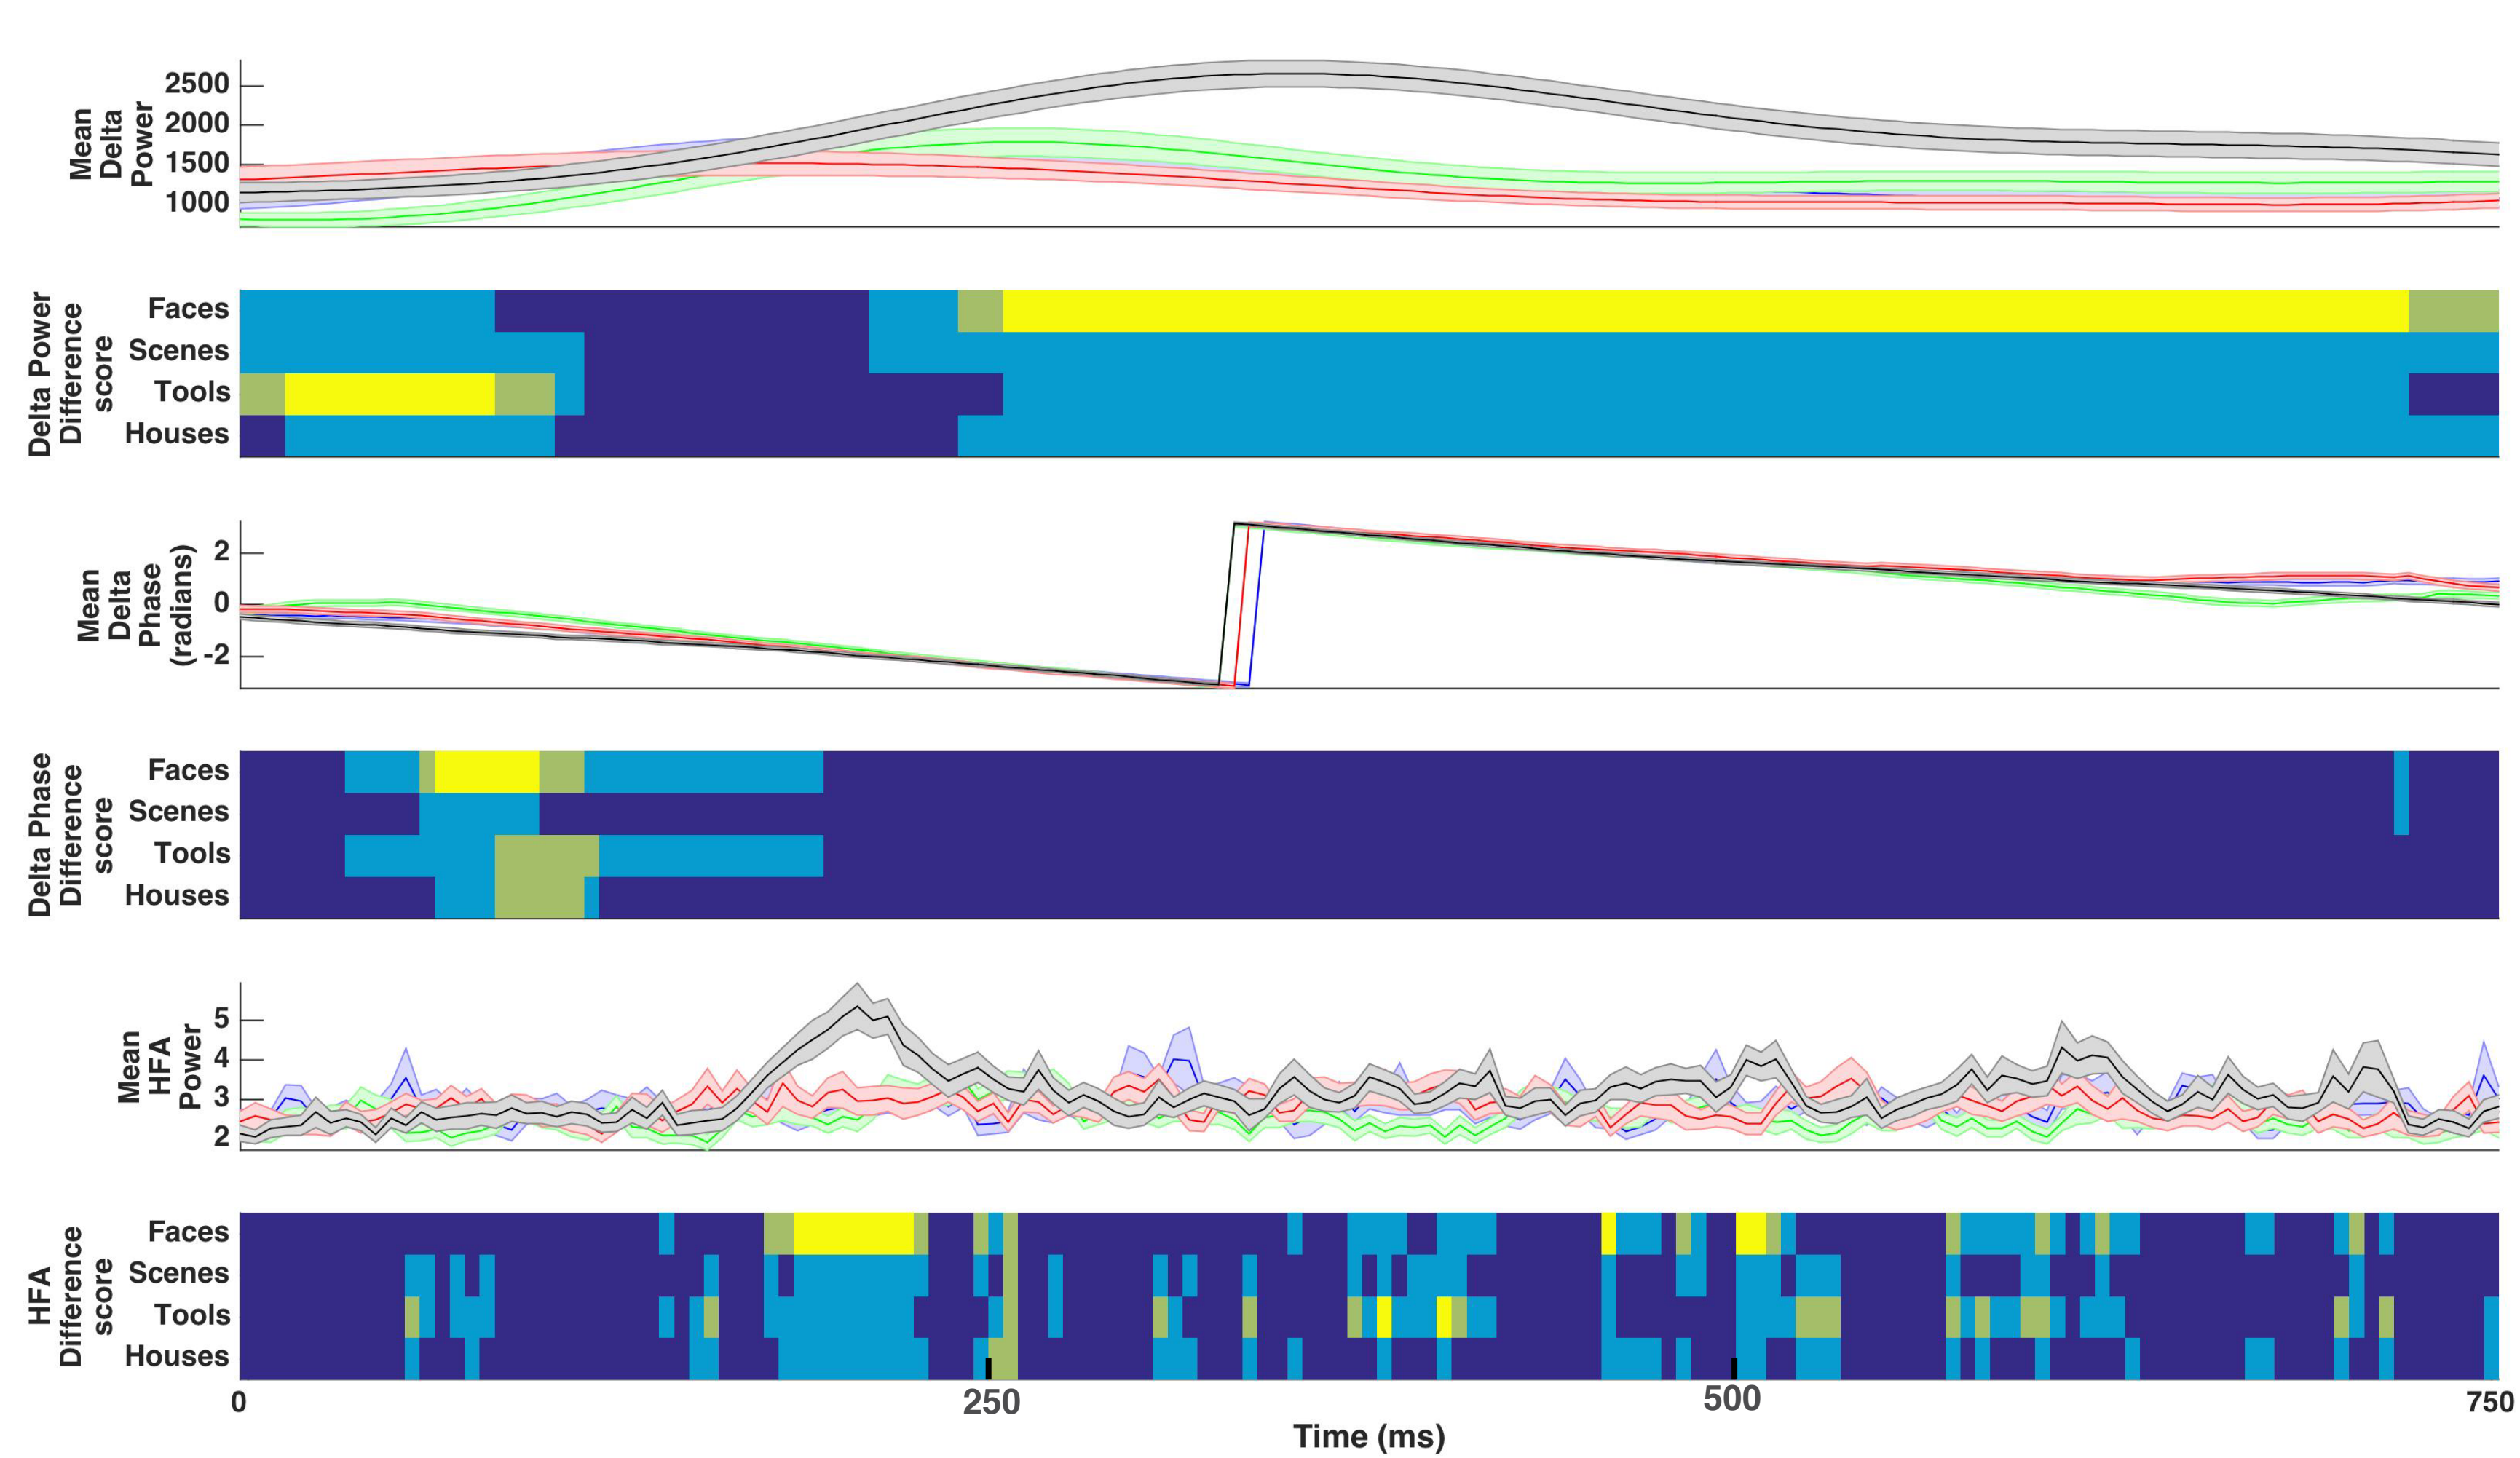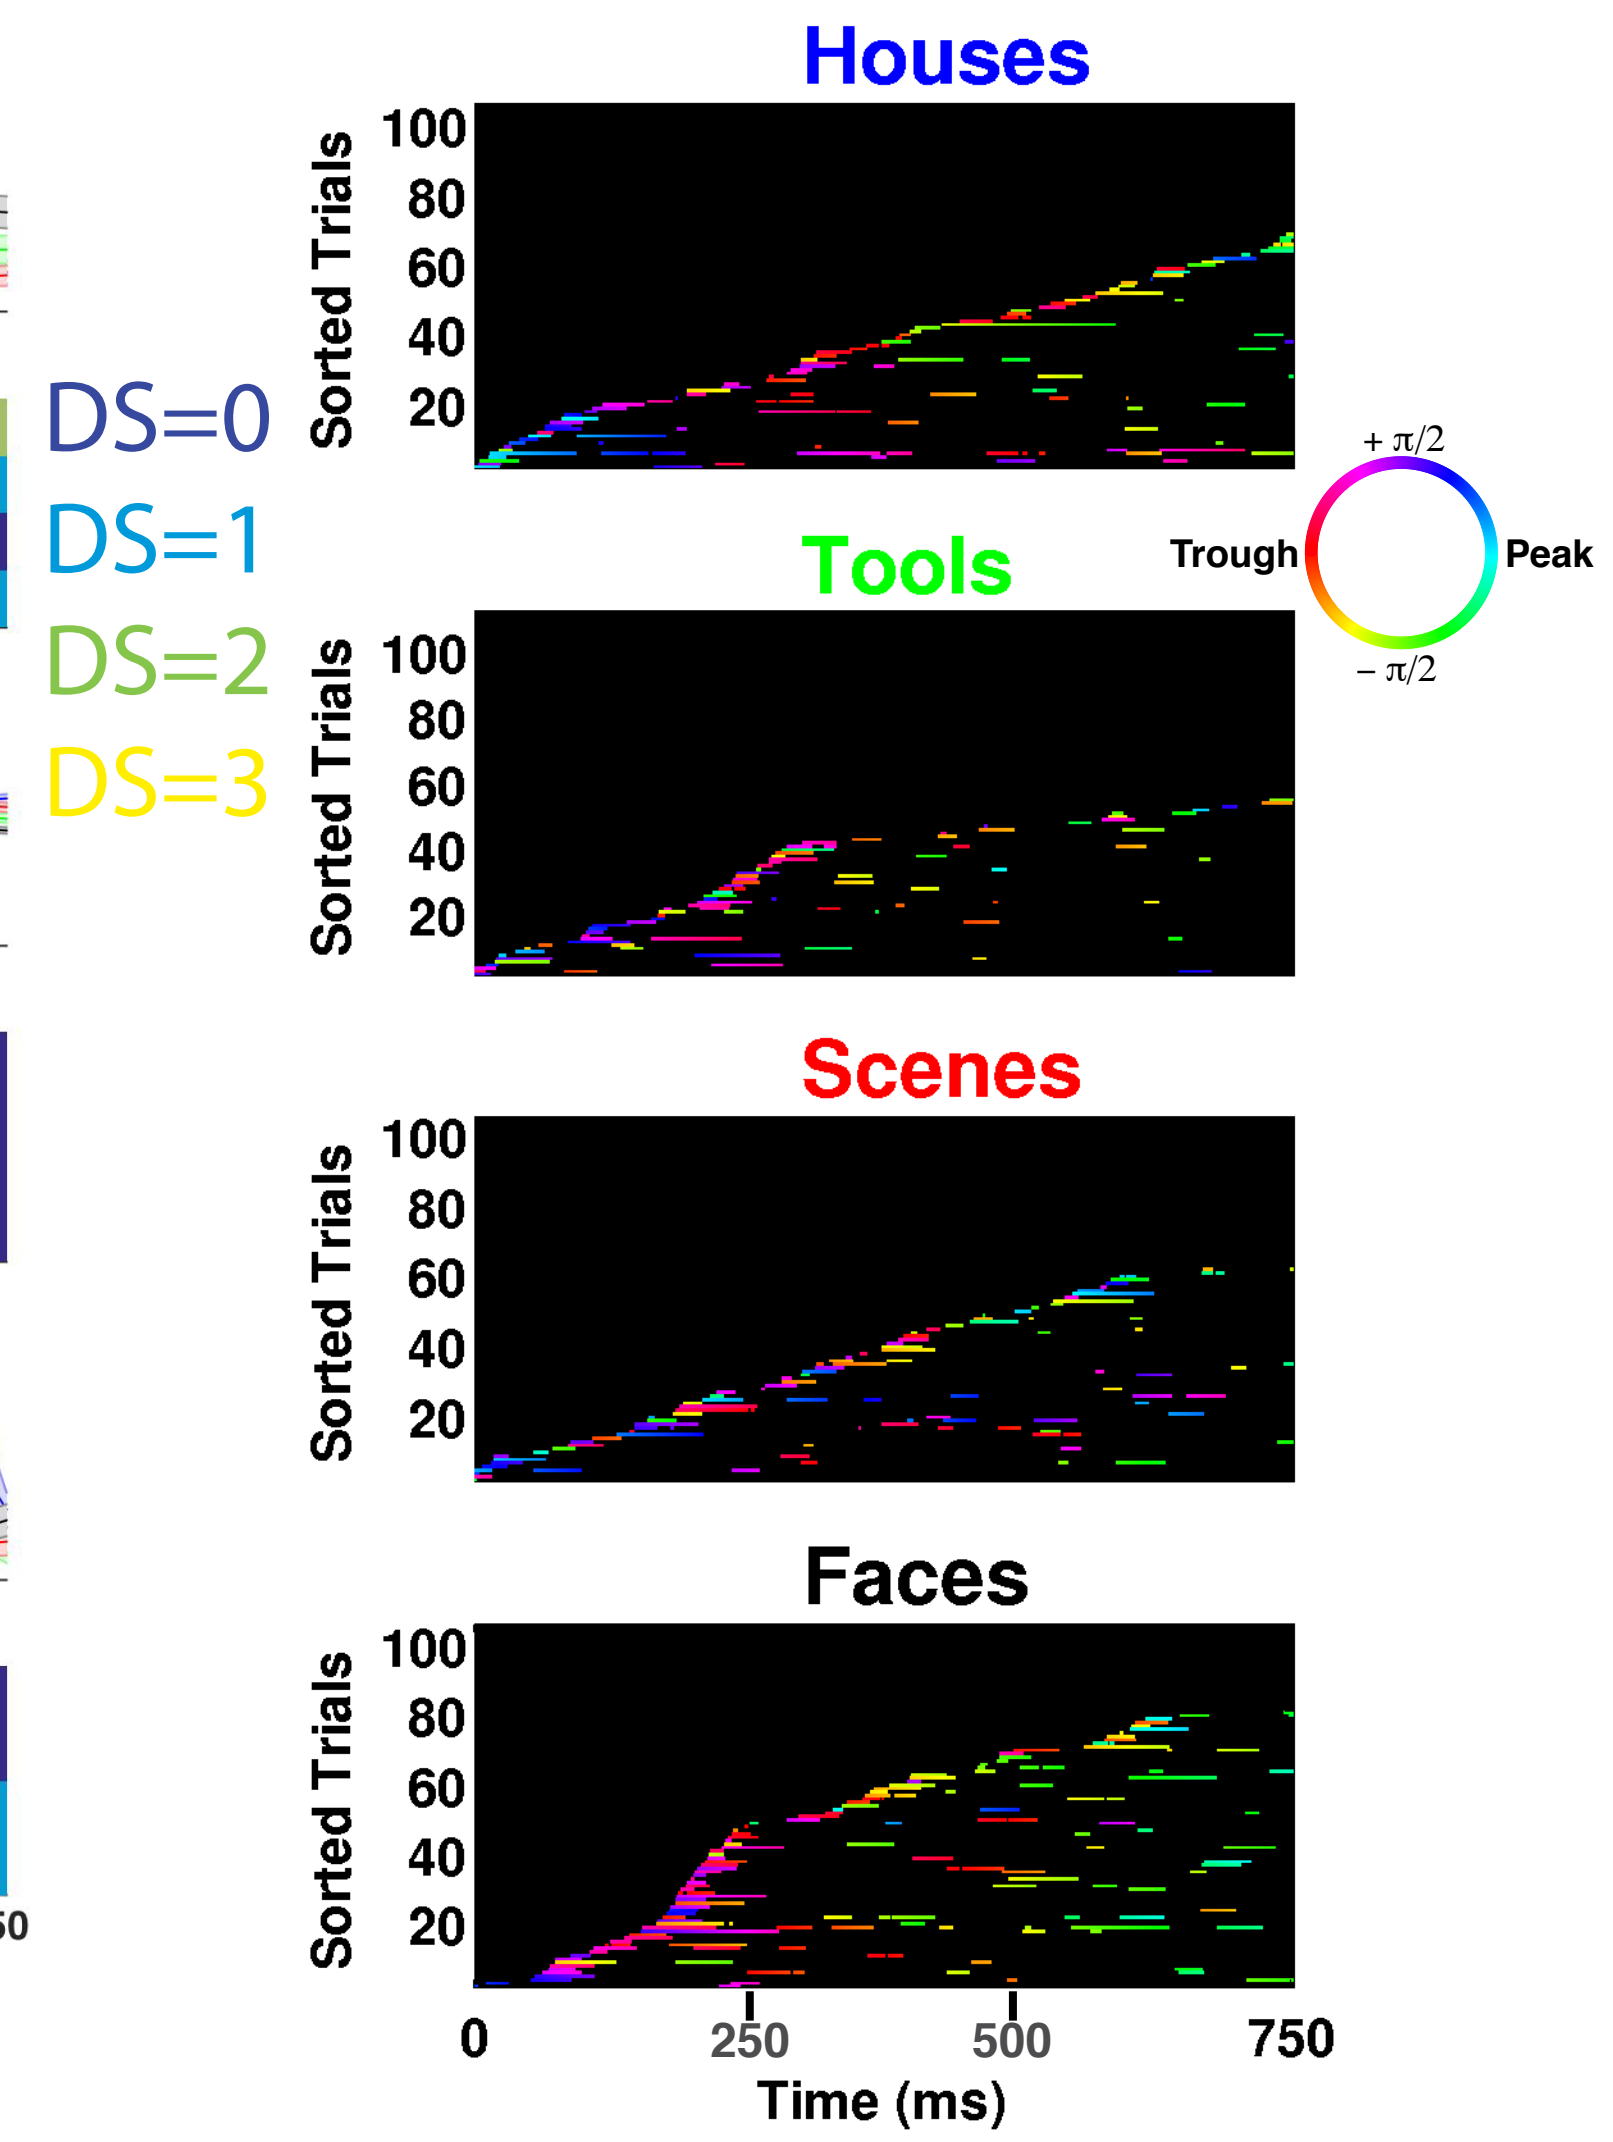

Supplement: supp [file elife-07886-supp-v1.zip › elife_poa_e07886_Figure_3_figure_supplement_1.pdf]

Summed Clustering Across Categories

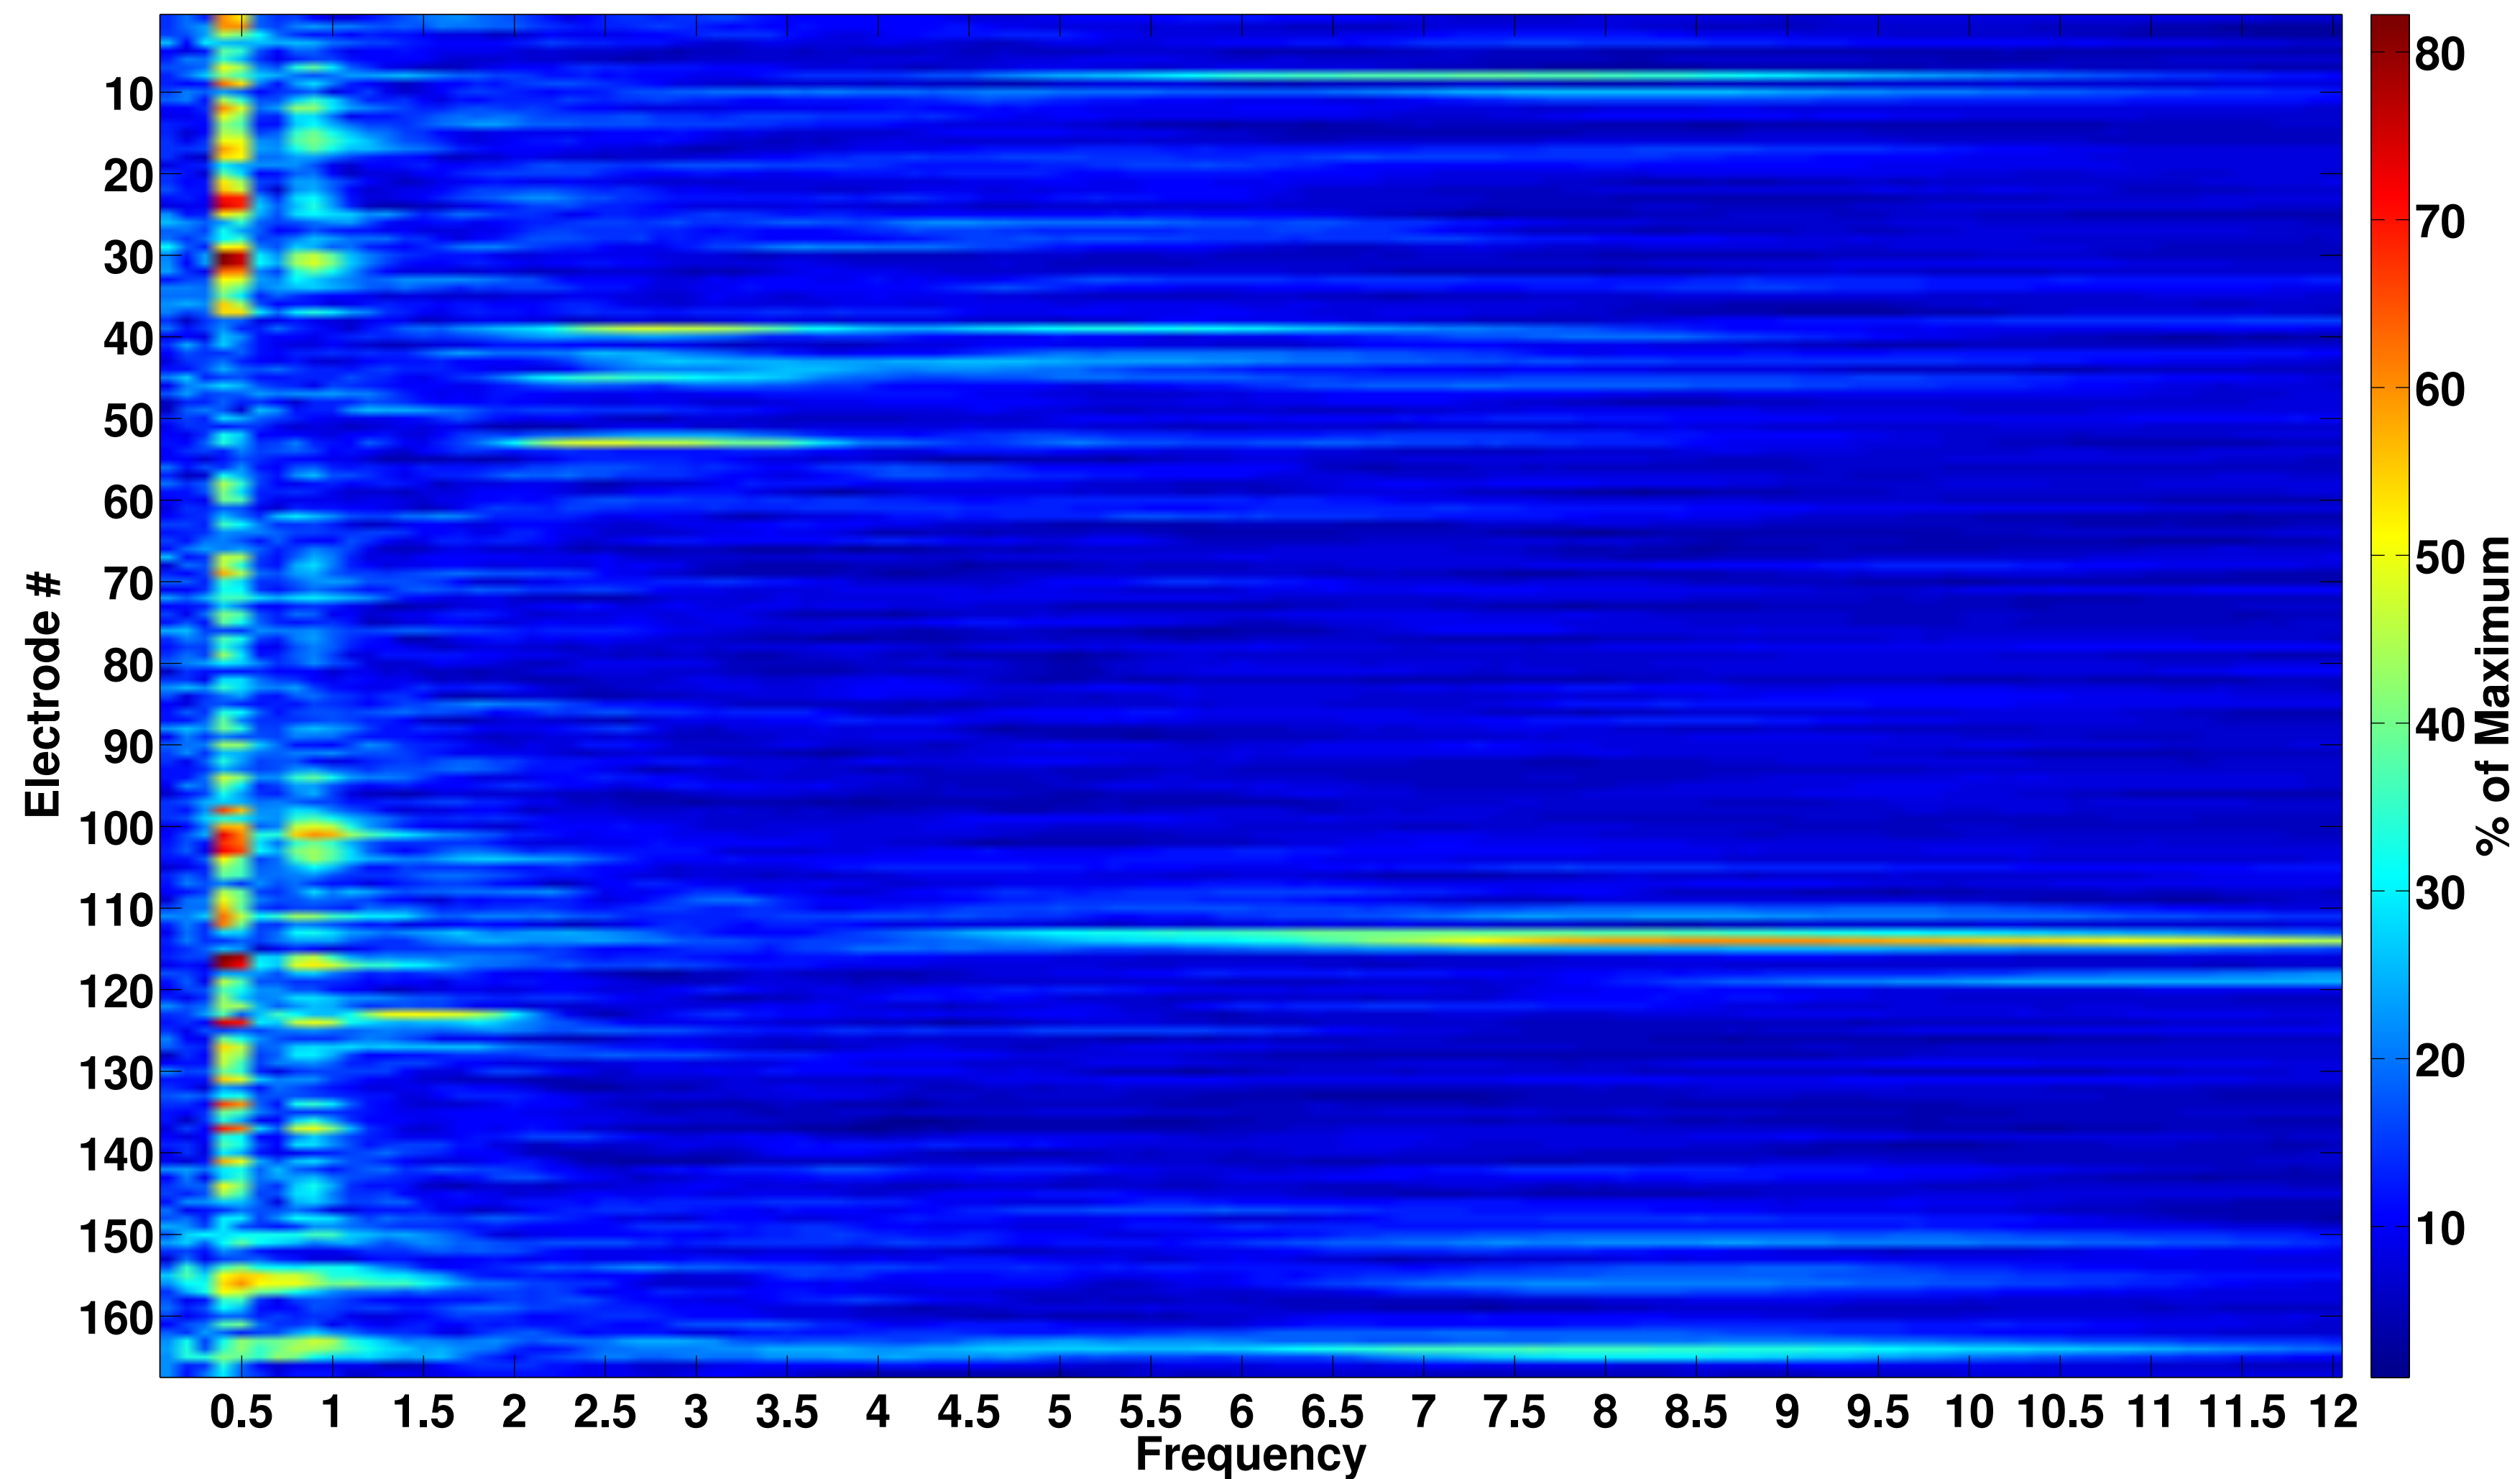

Supplement: supp [file elife-07886-supp-v1.zip › elife_poa_e07886_Figure_4_figure_supplement_2.pdf]

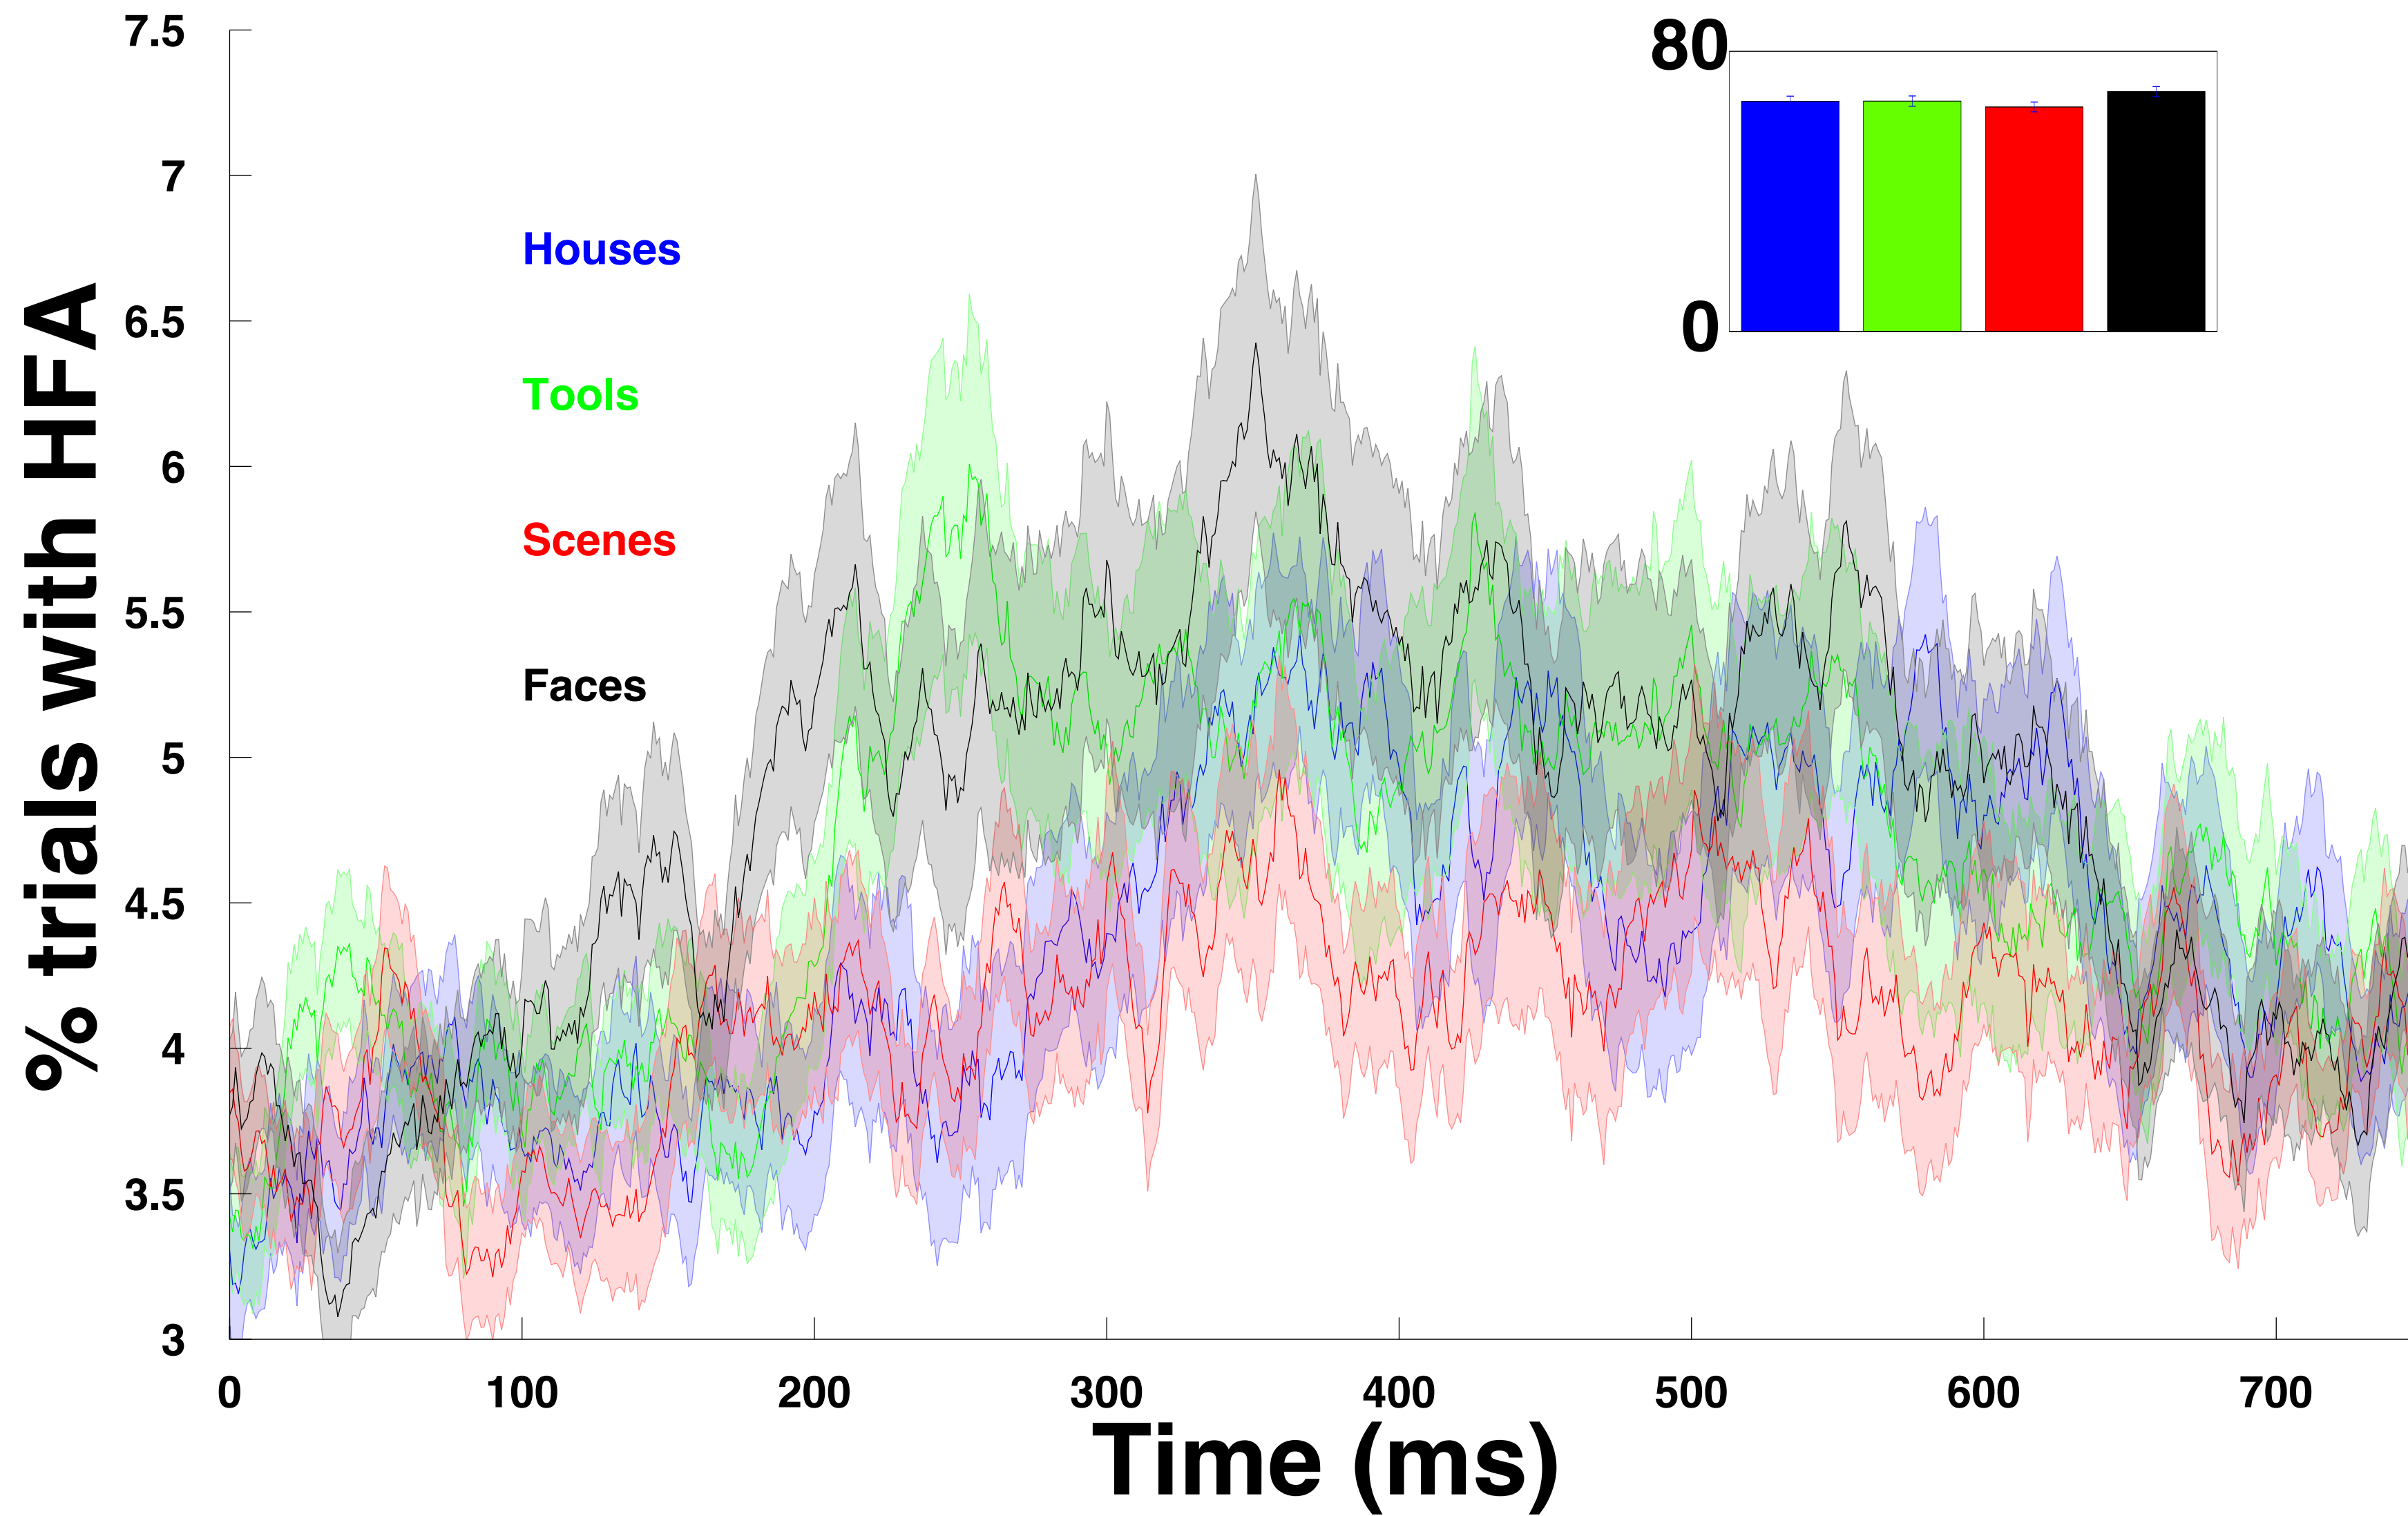

Supplement: supp [file elife-07886-supp-v1.zip › elife_poa_e07886_Figure_2_figure_supplement_2.pdf]

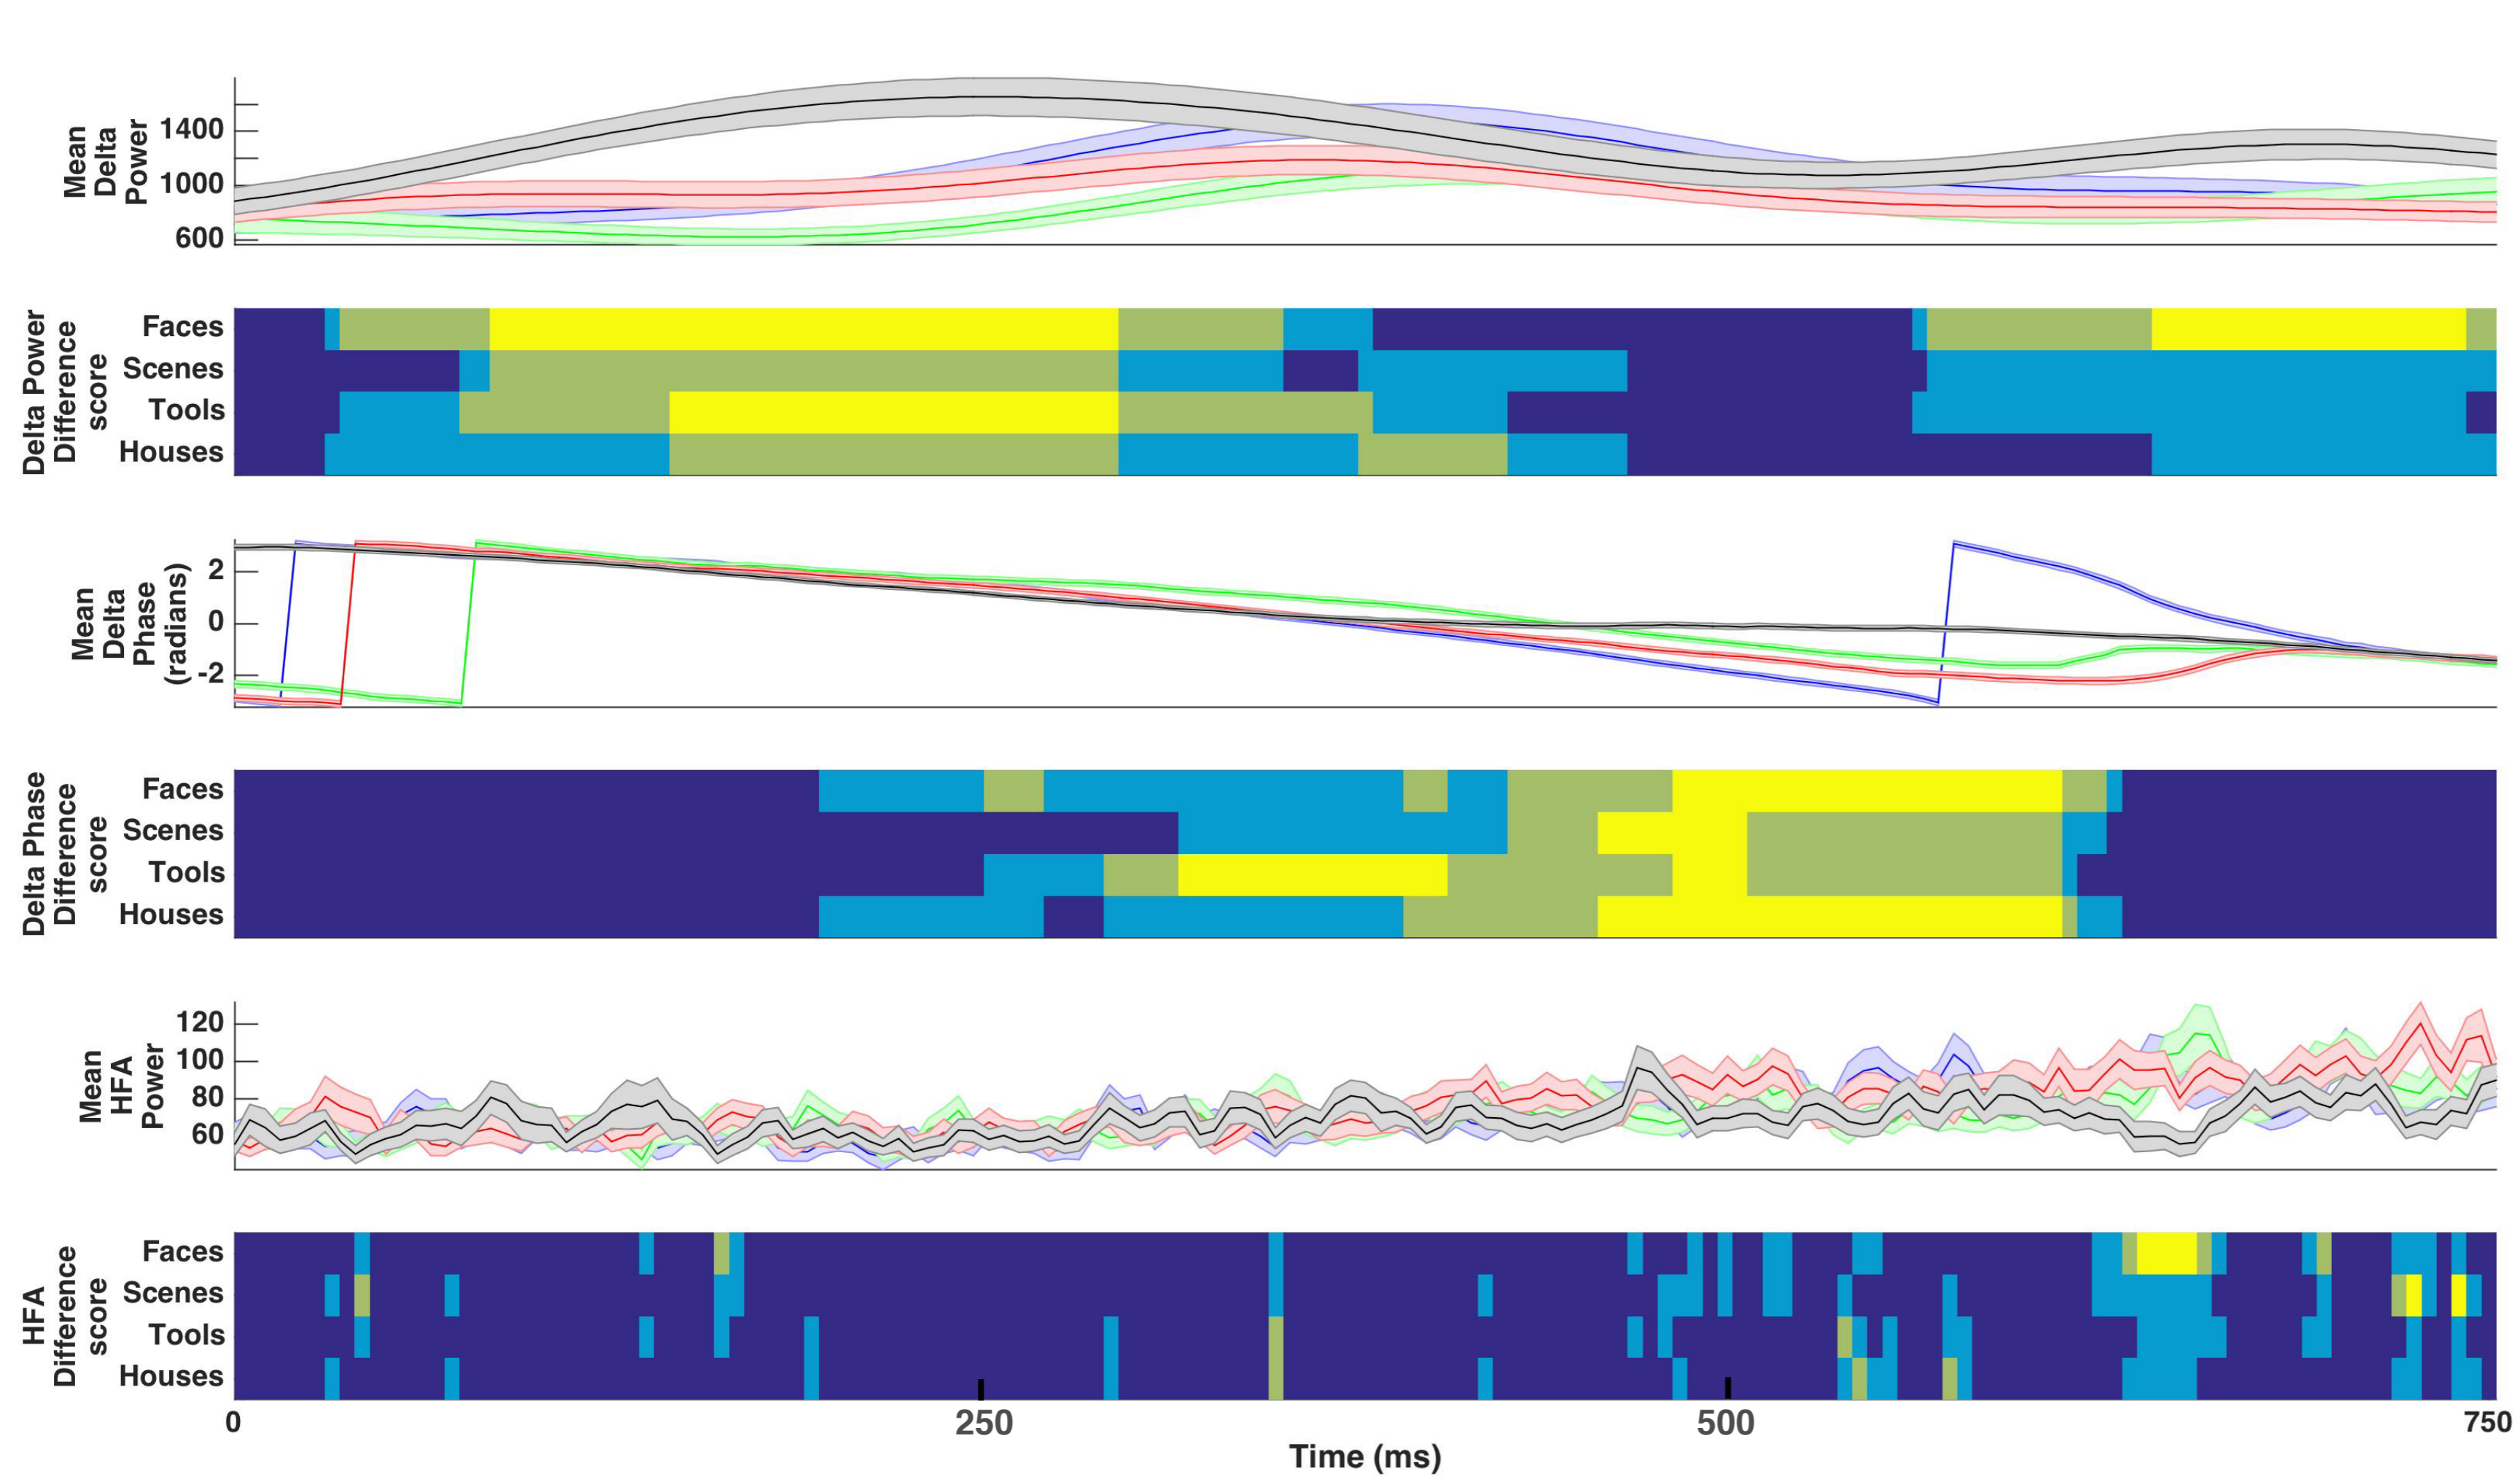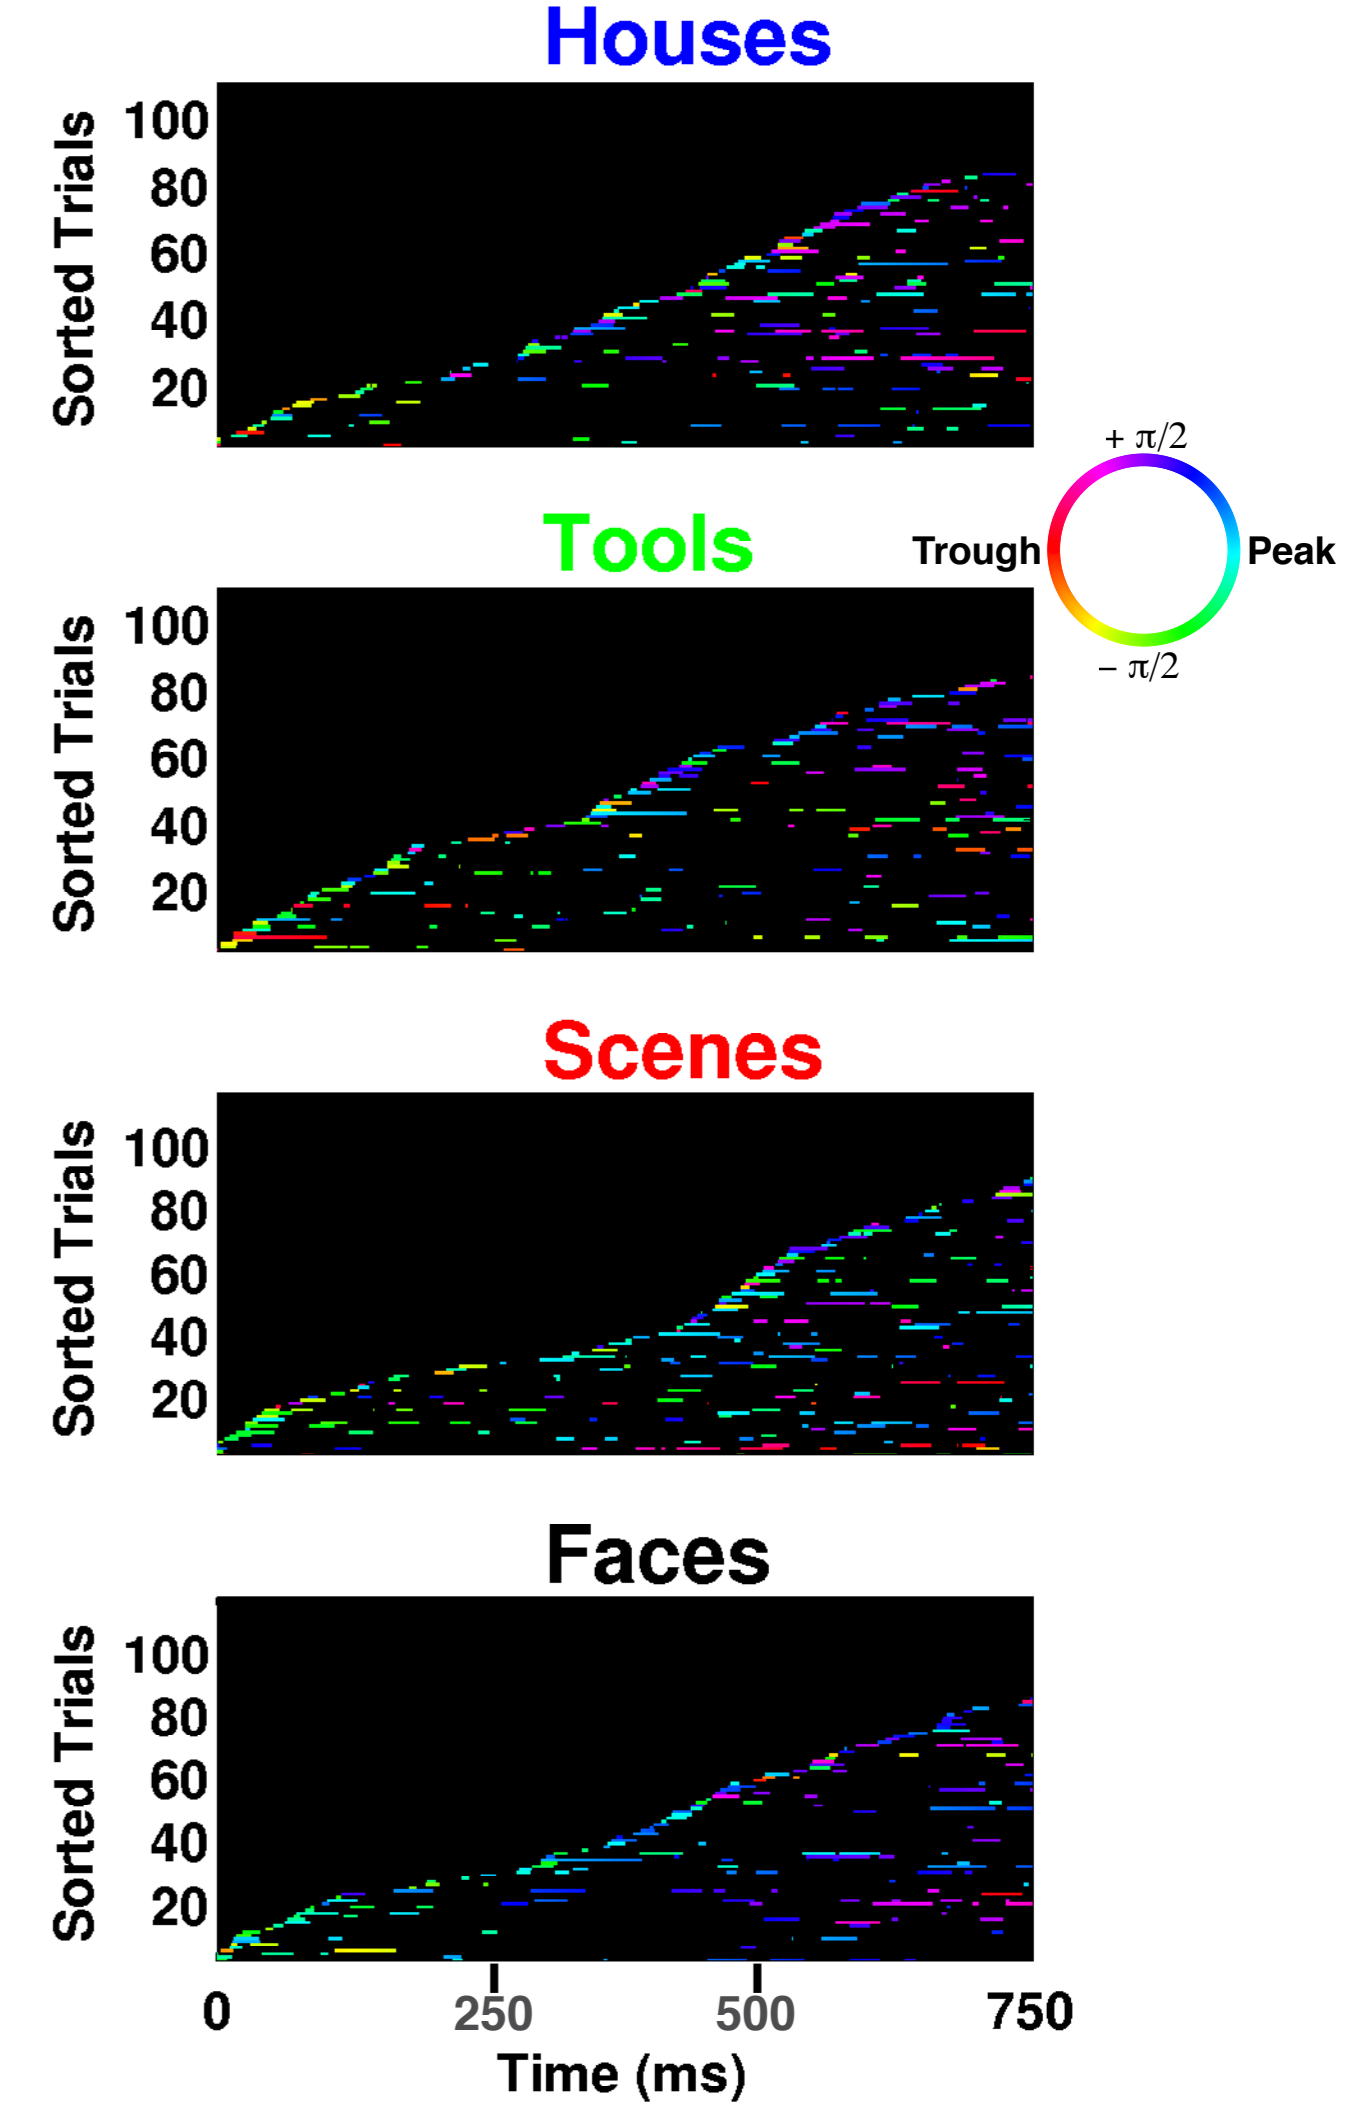

Supplement: supp [file elife-07886-supp-v1.zip › elife_poa_e07886_Figure_3_figure_supplement_2.pdf]
